# Supplementary material for: Dinitrogen activation by a phosphido-bridged binuclear cobalt complex
Source: Royal Society of Chemistry journal article supplement (doi:10.1039/d2dt03320h), 2022-01-01
Supplement: d2dt03320h1.pdf [file d2dt03320h1.pdf]

## Supporting Information

### Dinitrogen Activation by a Phosphido-Bridged Binuclear Cobalt Complex

Hai-Jun Li,<sup>‡</sup> Rui Feng,<sup>‡</sup> Gao-Xiang Wang, Junnian Wei,\* Zhenfeng Xi

Email: jnwei@pku.edu.cn

*Beijing National Laboratory for Molecular Sciences (BNLMS), Key Laboratory of Bioorganic Chemistry and Molecular Engineering of Ministry of Education, College of Chemistry, Peking University, Beijing 100871, China*

#### Table of Contents

**S1. Experimental Materials and Methods**

**S2. NMR, IR, UV and EPR Spectra**

**S3. Catalytic Reduction of Molecular Dinitrogen into Silyamine**

**S4. X-Ray Crystal Structure Data**

**S5. Calculations**

**S6. References**

## S1. Experimental Materials and Method

### General methods

Starting materials were purchased from Sigma-Aldrich, TCI, J&K, and others without further purification. All reactions were carried out under dinitrogen atmosphere. THF was dried by standard methods and freshly distilled over sodium before use. Other solvents were purified by an Mbraun SPS-800 Solvent Purification System.  $^1\text{H}$  NMR spectra were recorded on Bruker Avance 400 spectrometers, and deuterated solvents were purchased from Cambridge Isotopes, J&K. High resolution mass spectra (HRMS) were obtained using a Bruker Solarix XR Fourier Transform Ion Cyclotron Resonance Mass Spectrometer using ESI source. Elemental analyses were tested on a Vario EL elemental analyzer at the Analytical Center of Peking University. Infrared Spectra of solid samples were recorded on a Bruker AlphaII using a KBr pellet. X-ray single-crystal diffraction analyses were performed on an XtaLAB PRO 007HF(Mo). Silylamine was quantified by gas chromatography using a Shimadzu GC-2014 with a TCD detector using dodecane as internal. All DFT calculations were performed by ORCA 5.0.3.<sup>1,2</sup> Geometric structures were optimized employing the r2SCAN-3c level of theory.<sup>3-5</sup> Calculations for odd-electron complexes were performed in a doublet spin state. The optimized structures match well the crystal structures. The wave function analysis was performed by the Multiwfn software.<sup>6</sup> To pair the  $\alpha$  and  $\beta$  orbitals generated by the open shell calculations, biorthogonalization was performed based on the canonical orbitals by the Multiwfn software. The AdNDP analysis was performed to understand the Co-Co interaction.<sup>7</sup>

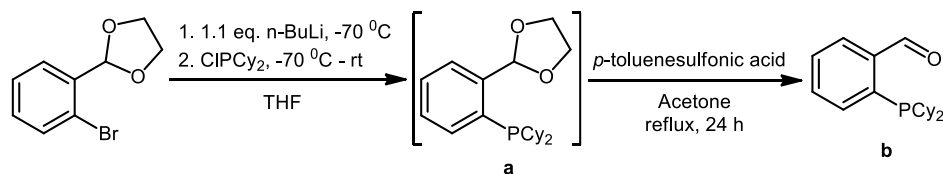

Figure S1. Synthesis of compound **b**

Compound **b** was prepared by the literature method and separated by flash column chromatography on silica gel (DCM : hexanes = 1:4) to afford compound **b** as colorless oil in 52% yield.<sup>8</sup>  $^1\text{H}$  NMR (400 MHz,  $\text{CDCl}_3$ ): 11.04 (d,  $J = 8.6$  Hz, 1H), 8.00 (dd,  $J = 7.6, 2.4$  Hz, 1H), 7.64 – 7.54 (m, 2H), 7.47 (t,  $J = 7.4$  Hz, 1H), 2.02 (t,  $J = 11.9$  Hz, 2H), 1.87 (d,  $J = 13.0$  Hz, 2H), 1.78 (d,  $J = 13.0$  Hz, 2H), 1.66 – 1.60 (m, 5H), 1.37 – 0.85 (m, 11H).

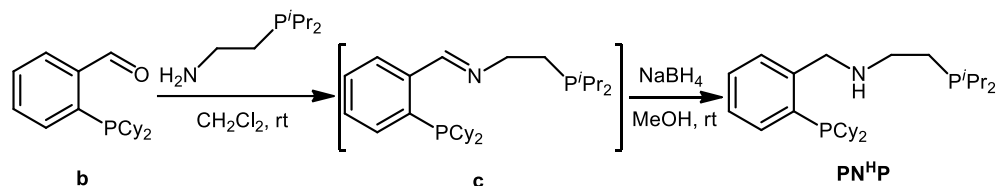

Figure S2. Synthesis of **PN<sup>H</sup>P**

Compound **PN<sup>H</sup>P** was prepared by the literature method<sup>9</sup> with around 100% yield. The compound **PN<sup>H</sup>P** was used for the next step without further purification. <sup>1</sup>H NMR (600 MHz, CDCl<sub>3</sub>): 7.43 – 7.41 (m, 1H), 7.35 – 7.33 (m, 1H), 7.26 (t, *J* = 7.0 Hz, 1H), 7.21 (td, *J* = 7.4, 1.3 Hz, 1H), 4.03 (d, *J* = 1.4 Hz, 2H), 2.73 – 2.69 (m, 2H), 1.91 – 1.86 (m, 4H), 1.76 – 1.72 (m, 2H), 1.71 – 1.66 (m, 2H), 1.63 – 1.62 (m, 4H), 1.57 – 1.53 (m, 2H), 1.49 (d, *J* = 12.8 Hz, 2H), 1.30 – 1.09 (m, 10H), 1.06 – 0.99 (m, 12H); <sup>13</sup>C NMR (151 MHz, CDCl<sub>3</sub>): 146.00 (d, *J* = 24.4 Hz), 132.71 (d, *J* = 19.9 Hz), 131.83 (d, *J* = 2.6 Hz), 128.44 (d, *J* = 6.3 Hz), 127.67, 125.32, 51.74 (d, *J* = 21.6 Hz), 47.15 (d, *J* = 25.6 Hz), 33.00 (d, *J* = 12.3 Hz), 29.59 (d, *J* = 16.9 Hz), 28.17 (d, *J* = 8.6 Hz), 26.18 (d, *J* = 12.6 Hz), 26.05 (d, *J* = 8.2 Hz), 25.37, 22.25 (d, *J* = 11.6 Hz), 21.76 (d, *J* = 17.5 Hz), 19.06 (d, *J* = 15.8 Hz), 17.74 (d, *J* = 9.6 Hz); <sup>31</sup>P NMR (243 MHz, CDCl<sub>3</sub>): -0.68, -16.23. HRMS (ESI), calcd for C<sub>27</sub>H<sub>48</sub>NP<sub>2</sub> [M+H]<sup>+</sup>: 448.32565, found: 448.32489.

**Synthesis of compound 1.** Compound **PN<sup>H</sup>P** (550 mg, 1.24 mmol) reacted with *n*-BuLi (0.50 mL, 2.4 M in hexane) to generate the lithium salt **PN<sup>Li</sup>P**. In the dinitrogen-filled glovebox, the THF solution of compound **PN<sup>Li</sup>P** was added to the THF solution of CoBr<sub>2</sub> (260 mg, 1.20 mmol) at room temperature. The solution was stirred overnight, and the color of the solution changed from reddish brown to black green. After completion of the reaction, the solvent was removed under vacuum and washed with cold hexane (2 mL), the residue was dissolved in diethyl ether and filtered through Celite. Part of the solvent was removed under vacuum, and the concentrated solution was recrystallized in diethyl ether under -30 °C to give the target compound a green solid in 50% yield (350 mg). Anal. Calcd. for C<sub>27</sub>H<sub>46</sub>BrCoNP<sub>2</sub> (**1**): C 55.39%, H 7.92%, N 2.39%. Found: C 55.50%, H 7.57%, N 2.28%. Magnetic susceptibility (Evans, C<sub>6</sub>D<sub>6</sub>, 298K):  $\mu_{\text{eff}} = 3.4 \mu\text{B}$ .

**Synthesis of compound 2.** KC<sub>8</sub> (122 mg, 0.90 mmol) was added to the THF solution of **1** (200 mg, 0.30 mmol) at room temperature, and the solution was stirred for 15 hours. The color of the

solution was changed from green to brown. The solvent was removed under vacuum, and the residue was extracted with diethyl ether. The solution was filtered through Celite, and the solvent was removed and dried under vacuum. Single crystals of **2** suitable for X-ray crystallography were obtained by recrystallization from Et<sub>2</sub>O/hexanes/small amount of THF at -30 °C as red solid in 30% yield (30 mg). Anal. Calcd. for C<sub>60</sub>H<sub>114</sub>Co<sub>2</sub>KN<sub>4</sub>O<sub>3</sub>P<sub>4</sub> [2(THF)<sub>3</sub>]: C 59.05%, H 9.42%, N 4.59%; Found: C 58.37%, H 9.34%, N 3.55%. IR (cm<sup>-1</sup>) ν(N<sub>2</sub>): 1928. Magnetic susceptibility (Evans, C<sub>6</sub>D<sub>6</sub>, 298K): μ<sub>eff</sub> = 2.2 μB. The elemental analysis tests were performed four times. However, the results were still unsatisfactory, maybe due to the presence of an indeterminate number of solvent molecules in the crystals.

**Synthesis of compound 3.** The THF solution of **2** was reacted with one equivalent of 2,2,2-cryptand and stirred for 1 hour. After completion of the reaction, the solvent was removed under vacuum, and the solid was dissolved in a small amount of diethyl ether and recrystallized at -30 °C to give red crystals of **3** that are suitable for X-ray crystallography. Anal. Calcd. for C<sub>78</sub>H<sub>156</sub>Co<sub>2</sub>KN<sub>6</sub>O<sub>9</sub>P<sub>4</sub> [3(diethyl ether)<sub>3</sub>]: C 58.44%, H 9.81%, N 5.24%; Found: C 57.89%, H 9.30%, N 5.27%. IR (cm<sup>-1</sup>) ν(N<sub>2</sub>): 1959.

## S2. NMR, IR and UV Spectra

### NMR Spectra of Compound PN<sup>H</sup>P

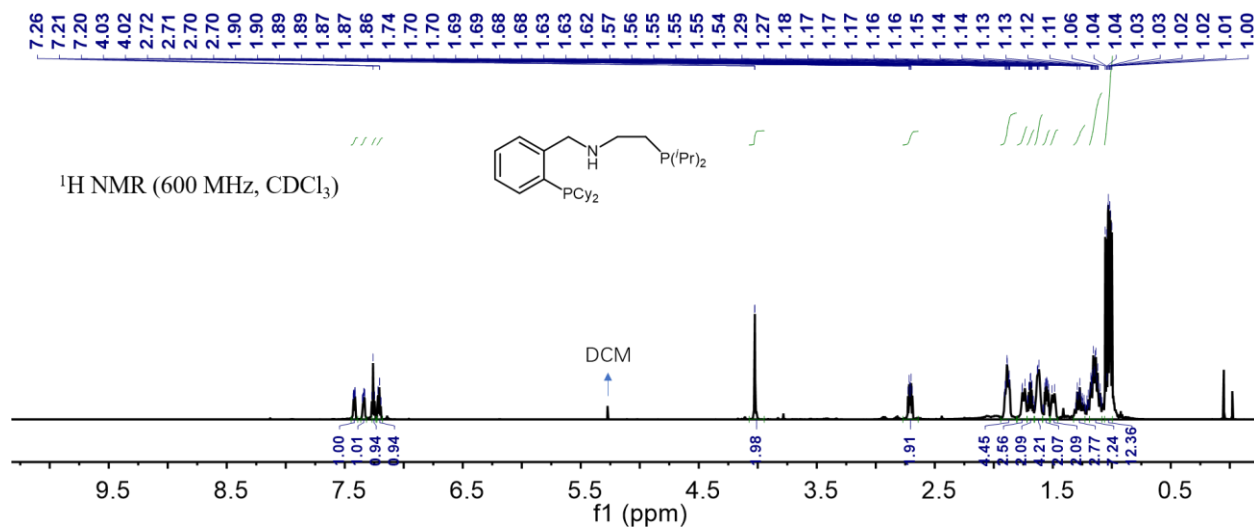

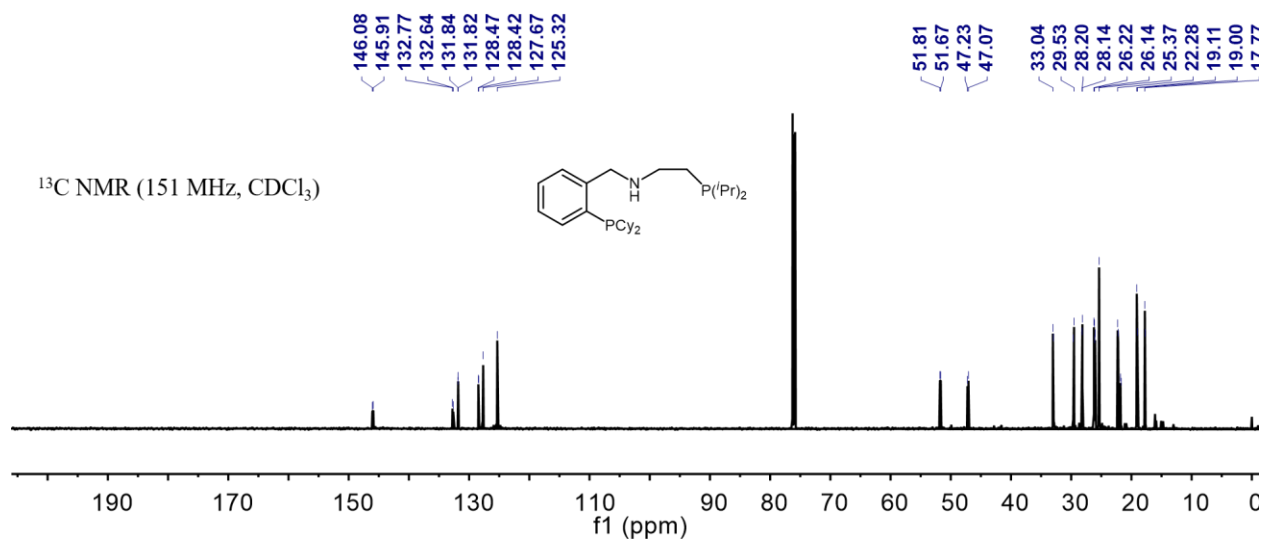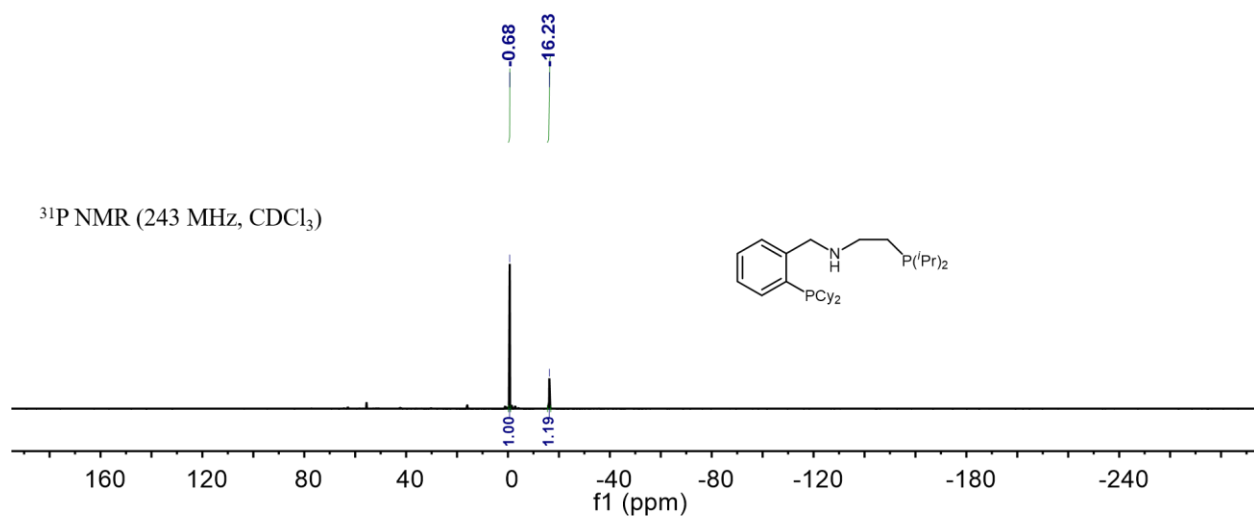

**Proton NMR Spectra of Compound 1 in Different Chemical Shift Range:**

$^1\text{H}$  NMR (600 MHz, THF- $d_8$ )

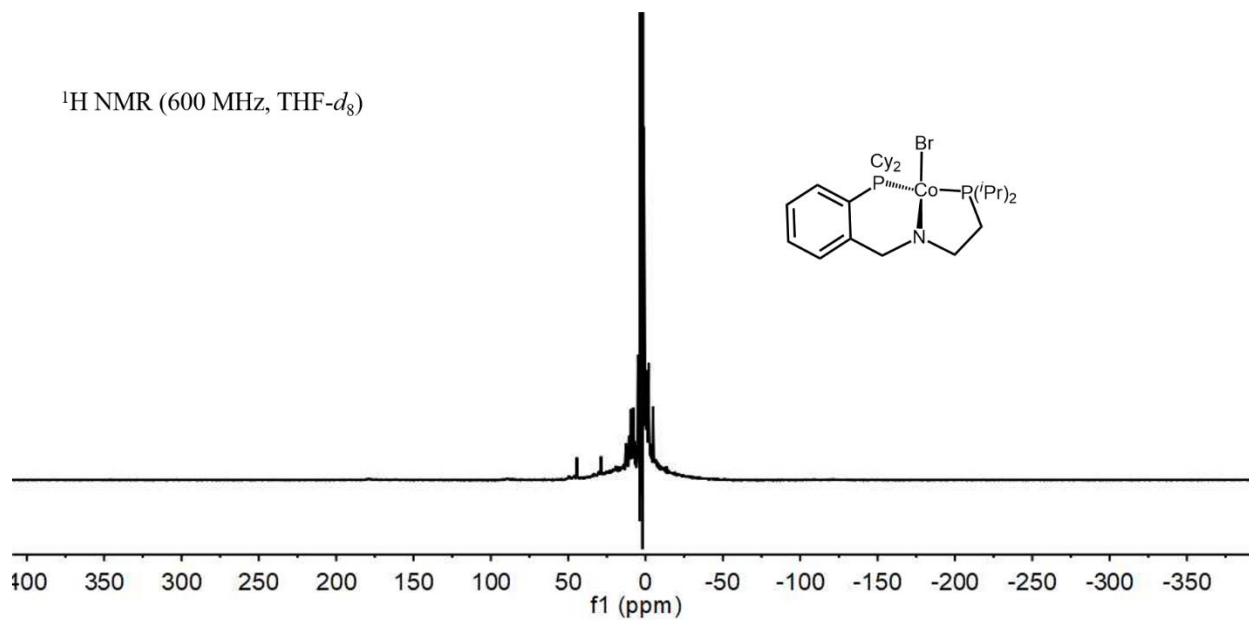

$^1\text{H}$  NMR (600 MHz, THF- $d_8$ )

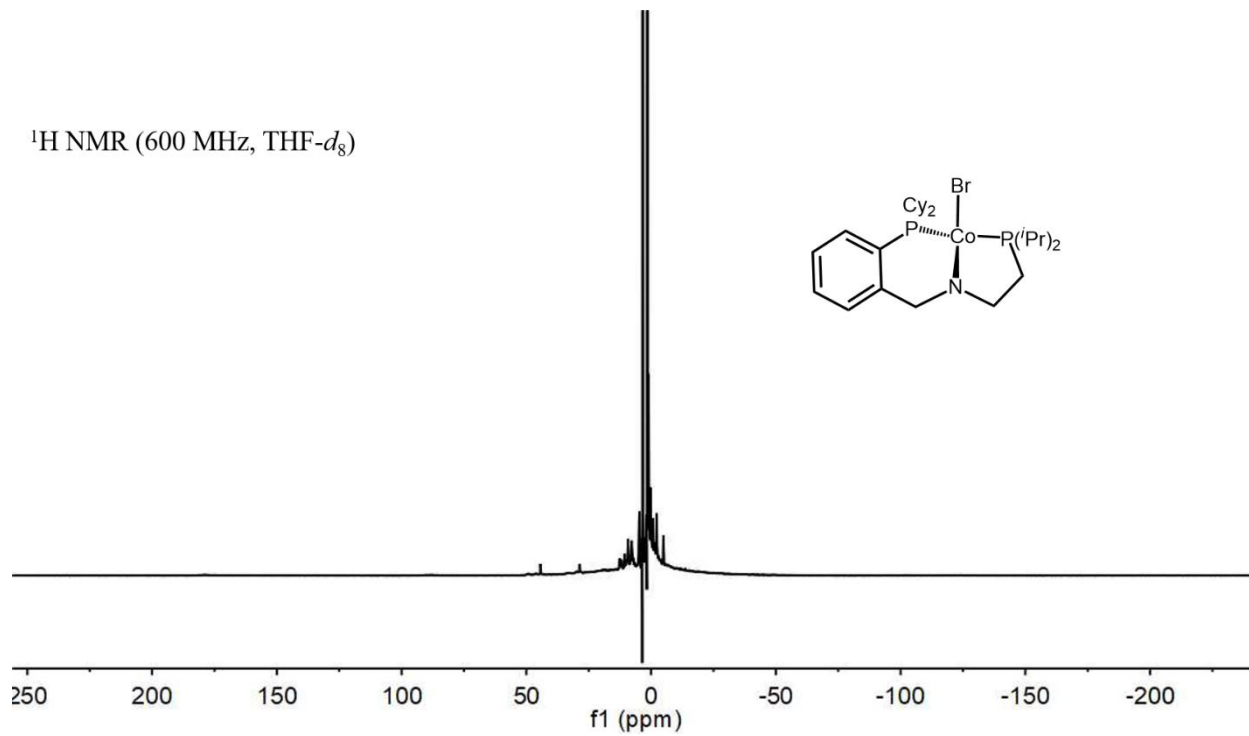

$^1\text{H}$  NMR (600 MHz,  $\text{THF-}d_8$ )

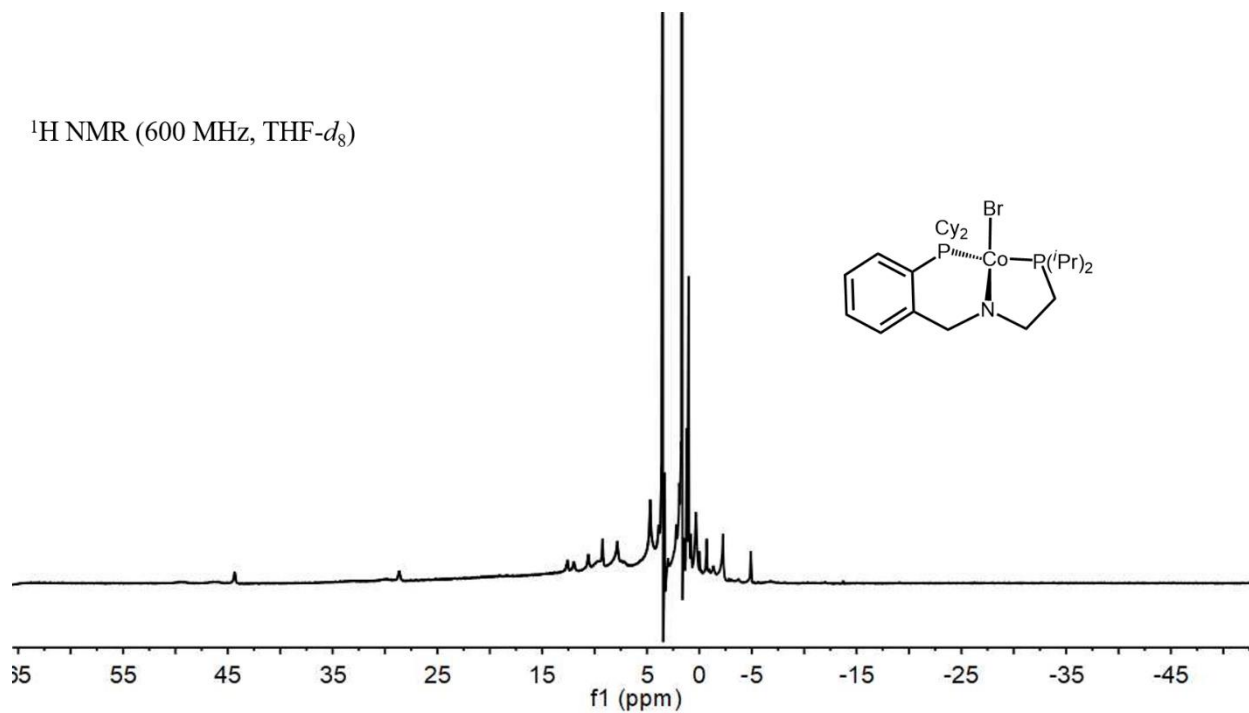

$^1\text{H}$  NMR (600 MHz,  $\text{THF-}d_8$ )

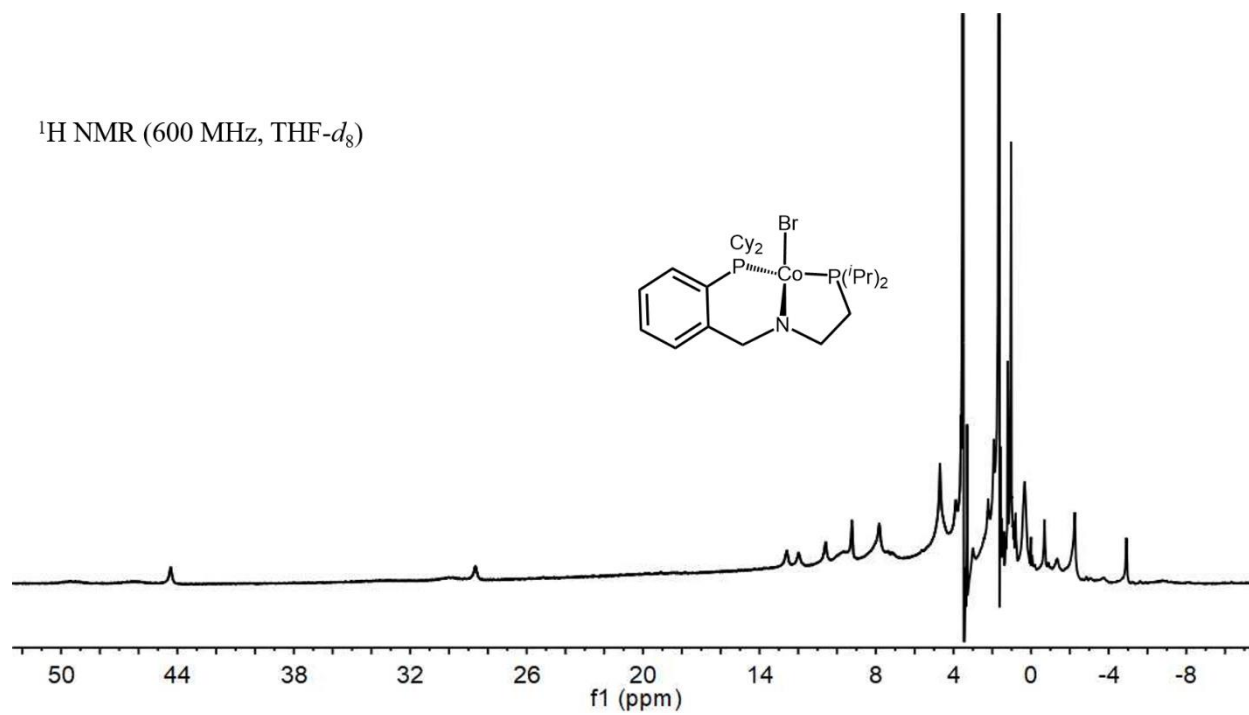

**Proton NMR Spectra of Compound 2 in Different Chemical Shift Range:**

$^1\text{H}$  NMR (600 MHz,  $\text{C}_6\text{D}_6$ )

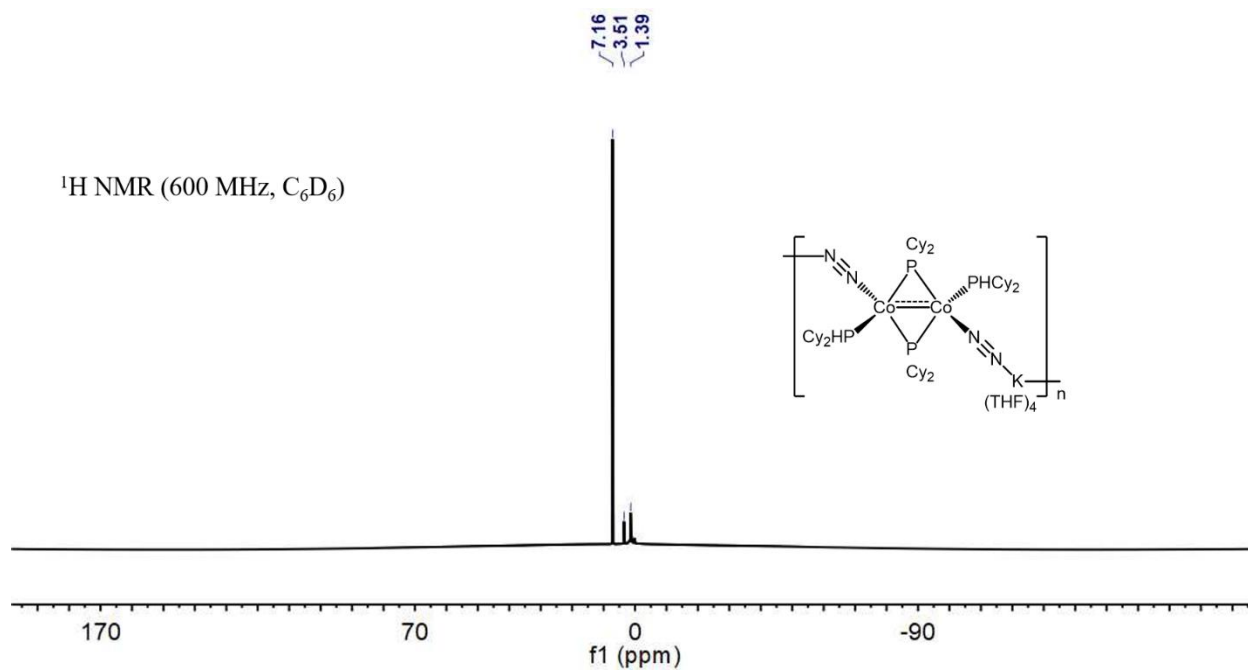

$^1\text{H}$  NMR (600 MHz,  $\text{C}_6\text{D}_6$ )

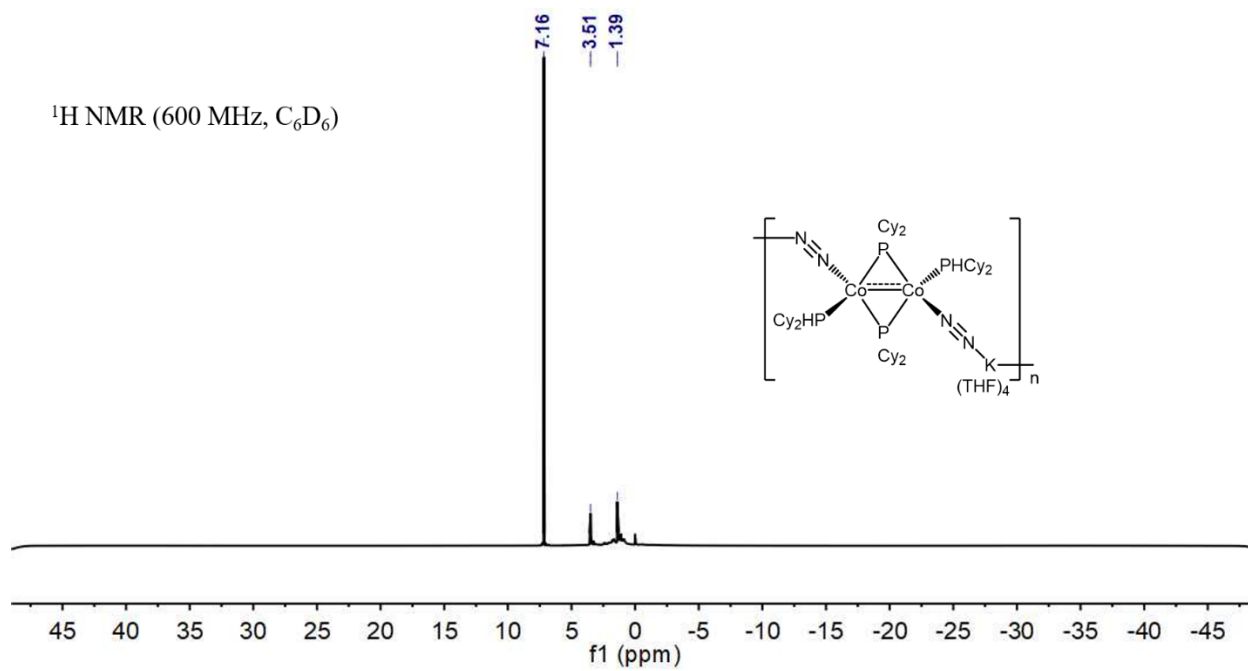





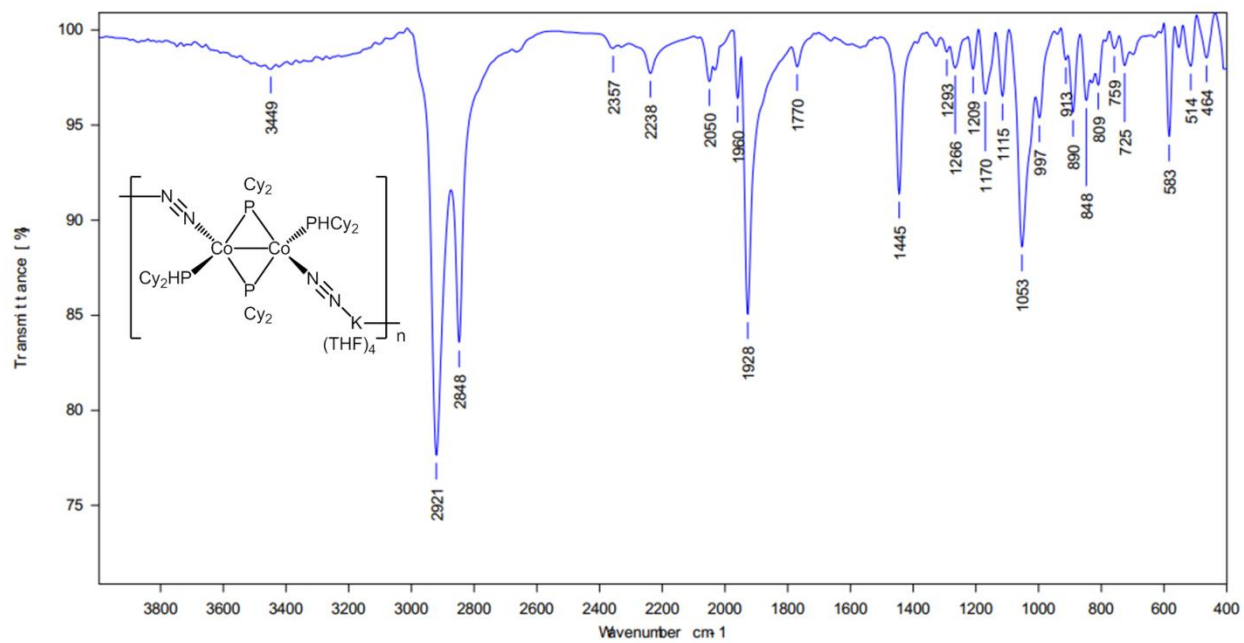

Figure S4. IR spectrum of **2**

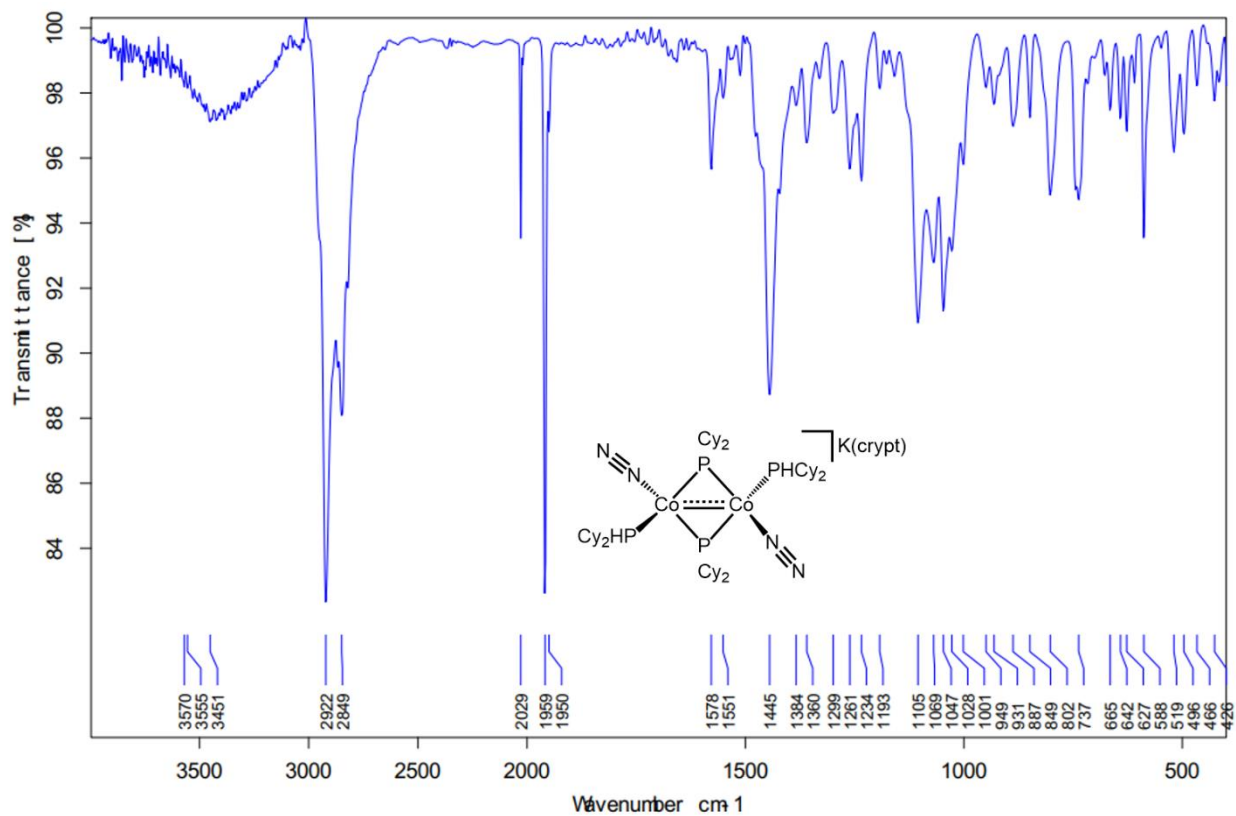

Figure S5. IR spectrum of **3**

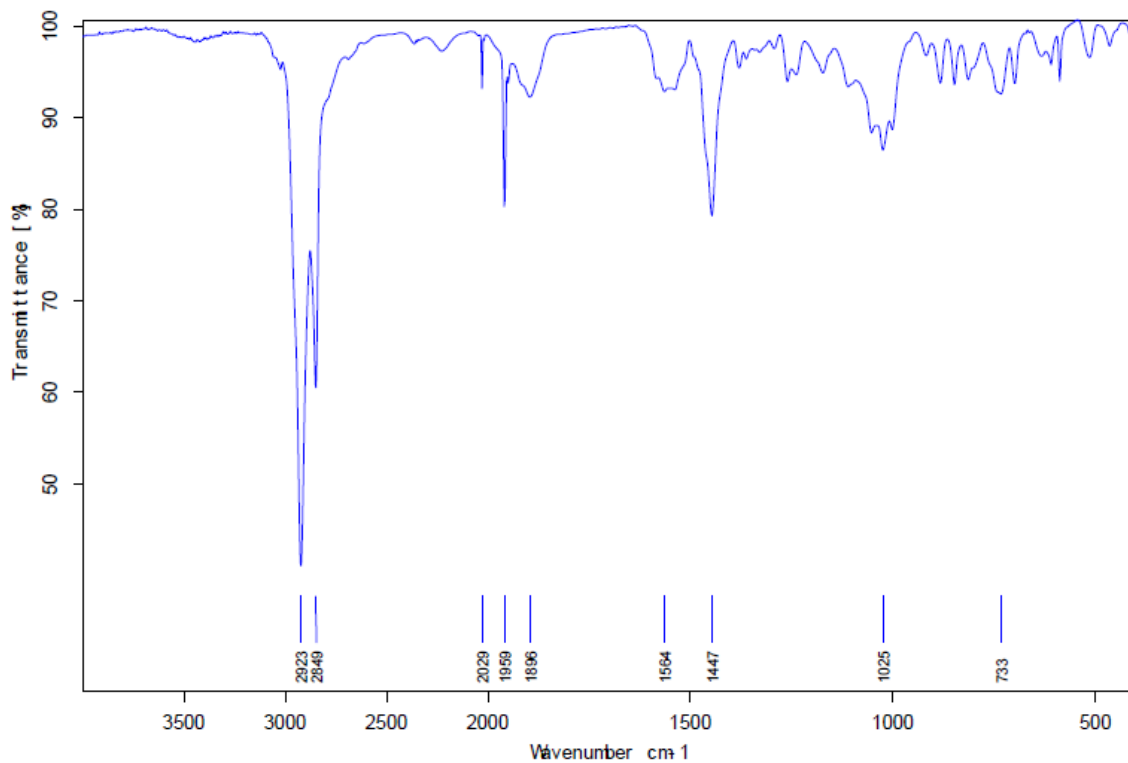

Figure S6. The *in-situ* IR spectrum of  $^{15}\text{N-2}$

When a single electron oxidizer,  $[\text{Cp}_2\text{Fe}][\text{BAr}_4^{\text{F}}]$  ( $\text{Ar}^{\text{F}} = 3,5\text{-bis(trifluoromethyl)benzene}$ ), was added to the THF solution of the dinuclear Co-N<sub>2</sub> anion complex **2** at room temperature and stirred for three hours, a new vibrational peak at  $2061\text{ cm}^{-1}$  could be observed in the IR spectrum. It might be assigned to the  $\nu_{\text{N}\equiv\text{N}}$  stretch in the corresponding neutral dicobalt-N<sub>2</sub> complex **4** (Figure S7). As a comparison, the FBO of the N-N bond in the corresponding neutral Co-N<sub>2</sub> complex **4** is 2.63. The calculated  $\nu_{\text{N}\equiv\text{N}}$  stretches **4** is  $2153\text{ cm}^{-1}$ , which matches the experimental results.

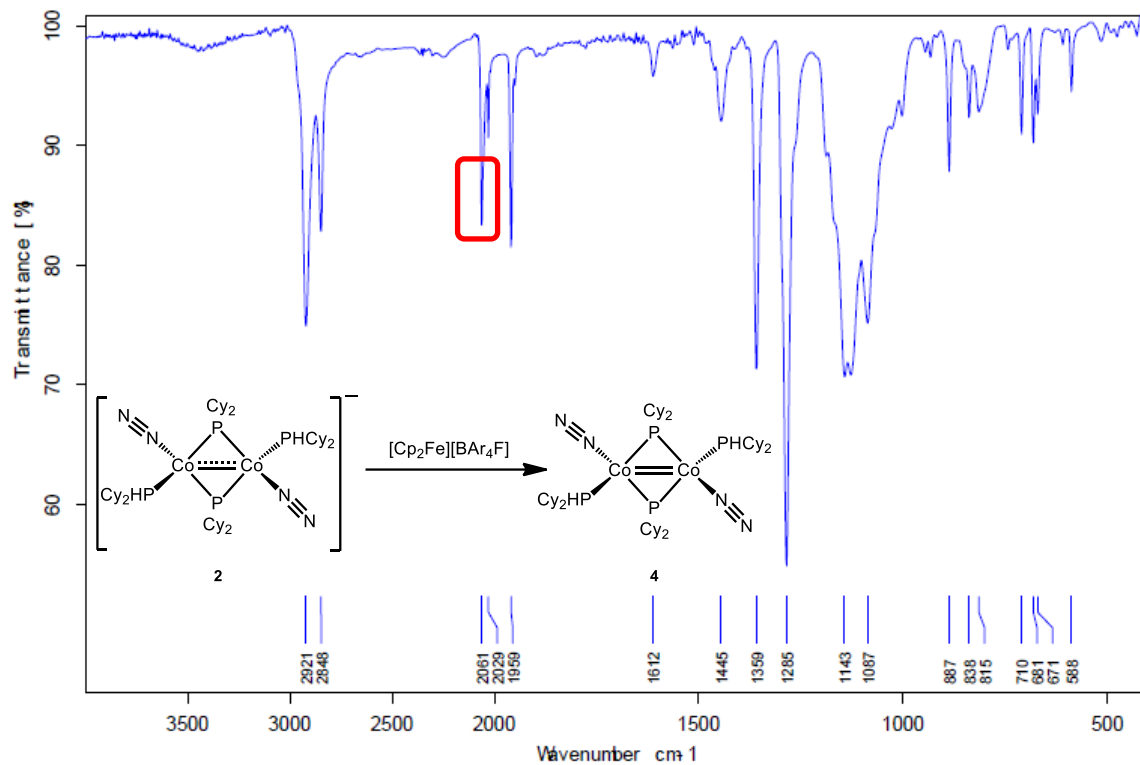

Figure S7. The *in-situ* IR spectrum of **2** + 1 eq. [Cp<sub>2</sub>Fe][BAR<sub>4</sub>F] (Ar<sup>F</sup> = 3,5-bis(trifluoromethyl)benzene) in THF.

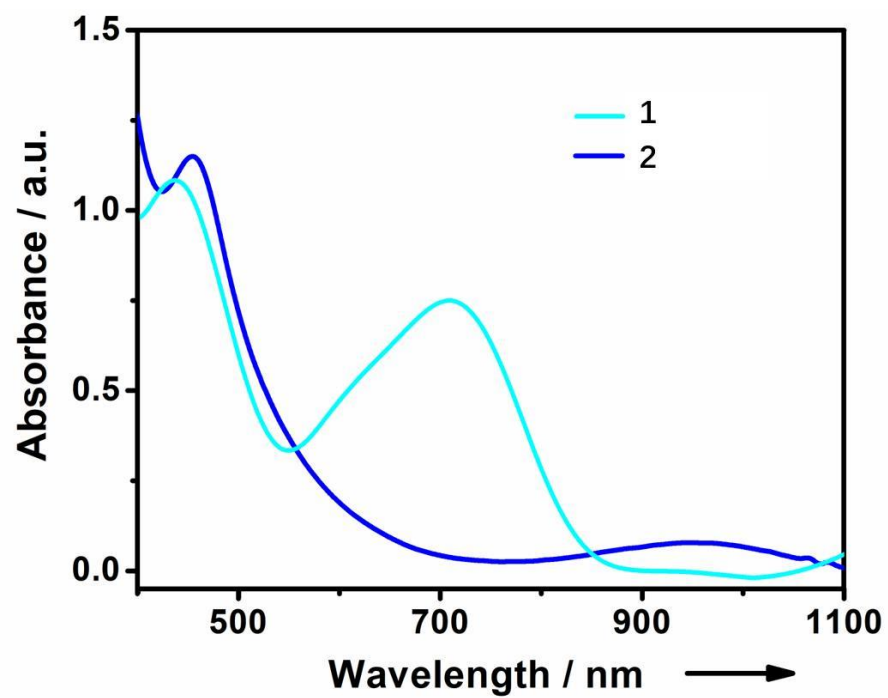

Figure S8. UV spectra of **1** and **2**

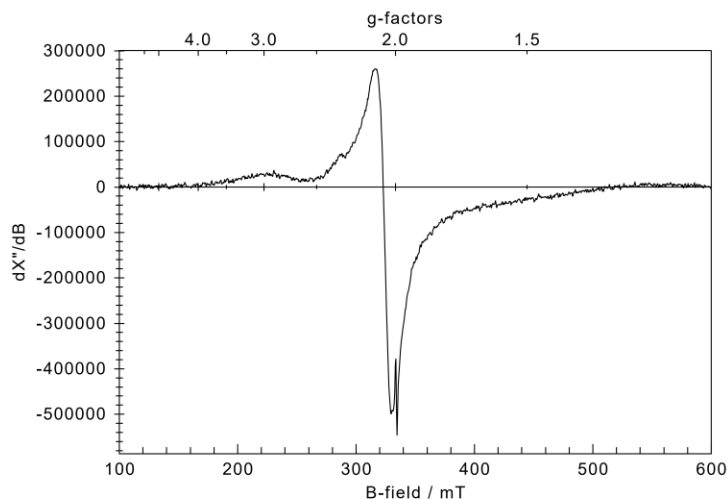

Figure S9. The EPR spectra of **2** in solid state at room temperature.

### S3. Catalytic Reduction of Molecular Dinitrogen into Silyamine

#### General procedure

Under an atmosphere of nitrogen, to a suspension of  $\text{KC}_8$  (270 mg, 2 mmol) in THF (10 mL) were added  $\text{Me}_3\text{SiX}$  ( $\text{X} = \text{Cl/I}$ , 2 mmol) and catalyst (0.001 mmol). The mixture was stirred at room temperature for 36 h. To the reaction mixture, dodecane (11  $\mu\text{L}$ , 0.05 mmol) was added as an internal standard for gas-liquid chromatography (GC) analysis. After stirring for 5 minutes, the mixture was centrifuged to remove insoluble materials. The resultant clear supernatant was subjected to GC analyses. Yields were the averaged data of two independent runs.

The reactions with  $\text{Et}_2\text{O}$  as the solvent or the K as the reductant were performed in a similar process. The reaction with 10,000 equiv. of reductants was performed with a catalyst amount of 0.3  $\mu\text{mol}$ .

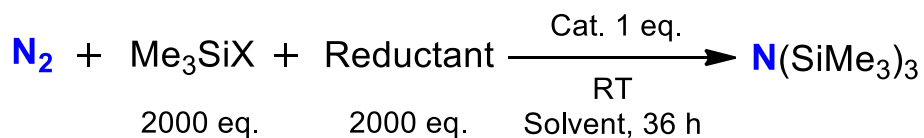

Table S1. Catalytic  $\text{N}_2$  silylation with  $\text{Me}_3\text{SiX}$  ( $\text{X} = \text{Cl/I}$ ) and  $\text{KC}_8$  after 36 h.

| Entry | Cat.     | $\text{Me}_3\text{SiX}$  | Reductant     | Solvent | Yield based on cat. (eq.) | Yield based on $e^-$ (%) |
|-------|----------|--------------------------|---------------|---------|---------------------------|--------------------------|
| 1     | <b>2</b> | $\text{Me}_3\text{SiI}$  | $\text{KC}_8$ | THF     | 28.8                      | 4.3                      |
| 2     | <b>2</b> | $\text{Me}_3\text{SiCl}$ | $\text{KC}_8$ | THF     | <b>87.2</b>               | <b>13.1</b>              |

|   |          |                      |                 |                   |      |      |
|---|----------|----------------------|-----------------|-------------------|------|------|
| 3 | <b>2</b> | Me <sub>3</sub> SiCl | K               | THF               | 84.3 | 12.6 |
| 4 | <b>2</b> | Me <sub>3</sub> SiCl | KC <sub>8</sub> | Et <sub>2</sub> O | 2.6  | 0.4  |
| 5 | <b>1</b> | Me <sub>3</sub> SiCl | KC <sub>8</sub> | THF               | 69.7 | 10.5 |

Table S2. Catalytic N<sub>2</sub> silylation with Me<sub>3</sub>SiCl and KC<sub>8</sub> with different time points and solvents.

| <b>Entry</b> | <b>Cat.</b>  | <b>Me<sub>3</sub>SiX</b> | <b>Reductant</b> | <b>Equiv.</b> | <b>Solvent</b>    | <b>Time</b> | <b>Yield based on cat. (eq.)</b> |
|--------------|--------------|--------------------------|------------------|---------------|-------------------|-------------|----------------------------------|
| <b>1</b>     | <b>CoNNK</b> | Me <sub>3</sub> SiCl     | KC <sub>8</sub>  | 2000          | THF               | 12 h        | 51.8                             |
| <b>2</b>     | <b>CoNNK</b> | Me <sub>3</sub> SiCl     | KC <sub>8</sub>  | 2000          | THF               | 24 h        | 77.4                             |
| <b>3</b>     | <b>CoNNK</b> | Me <sub>3</sub> SiCl     | KC <sub>8</sub>  | 2000          | THF               | 36 h        | 84.2                             |
| <b>4</b>     | <b>CoNNK</b> | Me <sub>3</sub> SiCl     | KC <sub>8</sub>  | 2000          | THF               | 48 h        | 84.1                             |
| <b>5</b>     | <b>CoNNK</b> | Me <sub>3</sub> SiCl     | KC <sub>8</sub>  | 10000         | Et <sub>2</sub> O | 42 h        | 87.1                             |
| <b>6</b>     | <b>CoNNK</b> | Me <sub>3</sub> SiCl     | KC <sub>8</sub>  | 10000         | Et <sub>2</sub> O | 66 h        | 85.7                             |

## S4. X-Ray Crystal Structure Data

|                                                                 | Compound 1                                                         | Compound 2(THF) <sub>3</sub>                                                                   | Compound 3(Et <sub>2</sub> O) <sub>3</sub>                                                     |
|-----------------------------------------------------------------|--------------------------------------------------------------------|------------------------------------------------------------------------------------------------|------------------------------------------------------------------------------------------------|
| CCDC No.                                                        | 2193855                                                            | 2193856                                                                                        | 2193857                                                                                        |
| Formula                                                         | C <sub>27</sub> H <sub>46</sub> BrCoNP <sub>2</sub>                | C <sub>60</sub> H <sub>114</sub> Co <sub>2</sub> KN <sub>4</sub> O <sub>3</sub> P <sub>4</sub> | C <sub>78</sub> H <sub>156</sub> Co <sub>2</sub> KN <sub>6</sub> O <sub>9</sub> P <sub>4</sub> |
| Formula weight                                                  | 585.43                                                             | 1220.39                                                                                        | 1602.92                                                                                        |
| Temp. (K)                                                       | 179.99(10)                                                         | 180.00(10)                                                                                     | 120.00(10)                                                                                     |
| Crystal system                                                  | Monoclinic                                                         | Monoclinic                                                                                     | Monoclinic                                                                                     |
| Space group                                                     | <i>P</i> 2 <sub>1</sub> / <i>c</i>                                 | <i>I</i> 2/ <i>a</i>                                                                           | <i>C</i> 2/ <i>c</i>                                                                           |
| <i>a</i> (Å)                                                    | 9.8615(3)                                                          | 24.7989(7)                                                                                     | 28.9250(7)                                                                                     |
| <i>b</i> (Å)                                                    | 15.4191(4)                                                         | 13.3737(3)                                                                                     | 18.5369(4)                                                                                     |
| <i>c</i> (Å)                                                    | 19.5790(5)                                                         | 22.8232(6)                                                                                     | 17.6376(4)                                                                                     |
| $\alpha$ (°)                                                    | 90                                                                 | 90                                                                                             | 90                                                                                             |
| $\beta$ (°)                                                     | 101.827(2)                                                         | 117.199(4)                                                                                     | 103.471(2)                                                                                     |
| $\gamma$ (°)                                                    | 90                                                                 | 90                                                                                             | 90                                                                                             |
| <i>V</i> [Å <sup>3</sup> ]                                      | 2913.89(14)                                                        | 6732.4(4)                                                                                      | 9196.7(4)                                                                                      |
| <i>Z</i>                                                        | 4                                                                  | 4                                                                                              | 4                                                                                              |
| $\rho_{\text{calcd}}$ (g·cm <sup>-3</sup> )                     | 1.334                                                              | 1.204                                                                                          | 1.158                                                                                          |
| $\mu$ (mm <sup>-1</sup> )                                       | 2.085                                                              | 0.692                                                                                          | 0.527                                                                                          |
| <i>F</i> (000)                                                  | 1228.0                                                             | 2636.0                                                                                         | 3484.0                                                                                         |
| Collected data                                                  | 25300                                                              | 25916                                                                                          | 33343                                                                                          |
| Unique data                                                     | 6627 [ <i>R</i> (int) = 0.0232]                                    | 7712 [ <i>R</i> (int) = 0.0250]                                                                | 10505 [ <i>R</i> (int) = 0.0217]                                                               |
| GOF on <i>F</i> <sup>2</sup>                                    | 1.039                                                              | 1.052                                                                                          | 1.067                                                                                          |
| Final <i>R</i> indexes<br>[ <i>I</i> > 2 $\sigma$ ( <i>I</i> )] | <i>R</i> <sub>1</sub> = 0.0275<br>$\omega R$ <sub>2</sub> = 0.0648 | <i>R</i> <sub>1</sub> = 0.0482<br>0.1314                                                       | <i>R</i> <sub>1</sub> = 0.0419<br>$\omega R$ <sub>2</sub> = 0.1071                             |
| <i>R</i> indexes (all data)                                     | <i>R</i> <sub>1</sub> = 0.0362<br>$\omega R$ <sub>2</sub> = 0.0675 | <i>R</i> <sub>1</sub> = 0.0587<br>$\omega R$ <sub>2</sub> = 0.1375                             | <i>R</i> <sub>1</sub> = 0.0506<br>$\omega R$ <sub>2</sub> = 0.1121                             |
| Completeness                                                    | 0.992                                                              | 0.998                                                                                          | 0.996                                                                                          |

## S5. Calculations

In our system, the energy difference for the doublet and quartet states is significant (23.3

kcal/mol), thus, the ground state of **3** should be doublet. We tried to investigate the electronic structure of **3** with several different broken symmetry states by employing the TPSSh/def2SVP level with Gaussian 16. However, the final converged results are the same regardless of the initial guess used ( $\langle S^2 \rangle = 0.81$ ). Thus, our calculation in this manuscript is reasonable.

We performed the AdNDP analysis for the  $\alpha$  and  $\beta$  orbitals separately. To make it clear, the 2c1e Co-Co bond ( $\alpha$ ), 2c1e Co-Co bond ( $\beta$ ), and 6c1e bond ( $\beta$ ) were shown in figure S9. The shapes of the Co-Co ( $\alpha$ ) and Co-Co ( $\beta$ ) 2c1e bonds match perfectly. Thus, we think there is a 2c2e Co-Co bond in complex **3**. The remaining 6c1e bond ( $\beta$ ) could be regarded as a delocalized metal-ligand pi-type bond. However, the overlap between the two Co centers cannot be ignored. The FBO of the Co-Co bond was 0.38 ( $\alpha$  spin) and 0.60 ( $\beta$  spin), respectively.

\*\*\*\*\*

### Input file of **3**

```
! r2SCAN-3c SlowConv opt freq tightSCF noautostart miniprint nopop
%maxcore 9000
%pal nprocs 16 end
* xyz -1 2
Co -1.13262400 -0.22880300 -0.44930200
P -0.32500800 1.75975300 -0.06936400
P -3.04842000 -0.41590500 0.53663600
N -1.60132000 -0.37527100 -2.16631500
N -1.88935800 -0.46073200 -3.25624300
C -0.27838500 2.96470200 -1.53072800
H 0.23529800 3.88520200 -1.20261600
C -0.87432500 2.98124300 1.27531500
H -1.68347500 3.60839300 0.86208000
C -1.41777200 2.26617500 2.51555900
H -2.25388900 1.61639100 2.24214600
H -0.63913600 1.60697000 2.91984000
C -4.22519000 1.05450900 0.36326600
H -3.54170200 1.91539100 0.43249800
C -4.19770000 -1.88743700 0.20733400
H -5.22788400 -1.58518700 0.45941500
C 0.50640700 2.38062700 -2.70821000
H 0.03262100 1.44457500 -3.02730000
H 1.51660700 2.11599700 -2.38510600
```



|   |             |             |             |
|---|-------------|-------------|-------------|
| C | -4.14284000 | -2.31522200 | -1.26420800 |
| H | -3.10079800 | -2.56338700 | -1.50289900 |
| H | -4.41571700 | -1.48886300 | -1.92854200 |
| C | -5.66862600 | 2.42546600  | -1.18612200 |
| H | -4.96719900 | 3.27174400  | -1.14294800 |
| H | -6.14485000 | 2.45748500  | -2.17501200 |
| C | 0.55811200  | 3.35369700  | -3.88965000 |
| H | 1.10528300  | 4.26180500  | -3.58990200 |
| H | 1.11704900  | 2.90623500  | -4.72287900 |
| C | -4.88289000 | 1.12112100  | -1.01911800 |
| H | -5.57685900 | 0.27538400  | -1.13613700 |
| H | -4.12177000 | 1.02740500  | -1.80287000 |
| C | -1.69181500 | 3.34735500  | -1.99703500 |
| H | -2.26866800 | 3.78661300  | -1.17317200 |
| H | -2.21499700 | 2.42747400  | -2.29342800 |
| C | -5.03428100 | -3.53001800 | -1.53715900 |
| H | -6.08687500 | -3.26430800 | -1.35207300 |
| H | -4.95974300 | -3.81512700 | -2.59478300 |
| C | -6.71962300 | 2.57768400  | -0.08371100 |
| H | -7.25856100 | 3.52817300  | -0.19402100 |
| H | -7.46607200 | 1.77529900  | -0.18811700 |
| C | -1.86221500 | 3.26081000  | 3.59322100  |
| H | -2.70375800 | 3.85886600  | 3.20865400  |
| H | -2.23393300 | 2.71989000  | 4.47419900  |
| C | -6.08029800 | 2.48706100  | 1.30423800  |
| H | -6.84899100 | 2.56168900  | 2.08542900  |
| H | -5.40095000 | 3.34118400  | 1.44389100  |
| C | -0.85061100 | 3.74126000  | -4.34551600 |
| H | -1.36135800 | 2.84196800  | -4.72033600 |
| H | -0.80628700 | 4.45803400  | -5.17724800 |
| C | -5.27712900 | 1.19040300  | 1.46832400  |
| H | -4.79310300 | 1.17346300  | 2.45357600  |
| H | -5.96412000 | 0.33103300  | 1.43619300  |
| C | 0.27906800  | 3.90712400  | 1.69330600  |
| H | 1.08730100  | 3.28045300  | 2.09481000  |
| H | 0.69156900  | 4.43474900  | 0.82412500  |
| C | -0.71994000 | 4.19818900  | 3.99035200  |
| H | 0.08147200  | 3.60437800  | 4.45422600  |
| H | -1.05880400 | 4.92526300  | 4.74125300  |
| C | -3.81174200 | -3.07552100 | 1.09905400  |
| H | -2.76176000 | -3.33518300 | 0.89583600  |

|    |             |             |             |
|----|-------------|-------------|-------------|
| H  | -3.87068600 | -2.79367000 | 2.15841700  |
| C  | -4.64700300 | -4.70678100 | -0.64056900 |
| H  | -5.30422000 | -5.56772600 | -0.82310600 |
| H  | -3.62403600 | -5.02390200 | -0.89269800 |
| C  | -0.15621800 | 4.91582200  | 2.76227700  |
| H  | 0.69193500  | 5.55333700  | 3.04860800  |
| H  | -0.92797300 | 5.58014200  | 2.34352300  |
| C  | -1.65759500 | 4.32029200  | -3.18155900 |
| H  | -2.68089100 | 4.55580200  | -3.50629000 |
| H  | -1.19888300 | 5.26811400  | -2.85955200 |
| C  | -4.69349000 | -4.29966600 | 0.83304000  |
| H  | -4.37526000 | -5.13463400 | 1.47175400  |
| H  | -5.73295800 | -4.06511300 | 1.10993200  |
| H  | -3.12696900 | -0.49640800 | 1.95953700  |
| Co | 1.13352400  | 0.22985500  | 0.45059400  |
| P  | 0.32592700  | -1.75865300 | 0.07033900  |
| P  | 3.04968500  | 0.41739500  | -0.53456500 |
| N  | 1.60138400  | 0.37600600  | 2.16784700  |
| N  | 1.88880300  | 0.46098400  | 3.25797500  |
| C  | 0.27898200  | -2.96397800 | 1.53138800  |
| H  | -0.23433200 | -3.88450100 | 1.20275400  |
| C  | 0.87569600  | -2.97962300 | -1.27460400 |
| H  | 1.68452300  | -3.60711000 | -0.86125500 |
| C  | 1.41999500  | -2.26391600 | -2.51411400 |
| H  | 2.25589600  | -1.61423000 | -2.23979300 |
| H  | 0.64161500  | -1.60451800 | -2.91856900 |
| C  | 4.22668900  | -1.05276600 | -0.36081600 |
| H  | 3.54342700  | -1.91376100 | -0.43086400 |
| C  | 4.19842100  | 1.88928900  | -0.20510100 |
| H  | 5.22864300  | 1.58767900  | -0.45779100 |
| C  | -0.50658800 | -2.38054700 | 2.70867000  |
| H  | -0.03308100 | -1.44466700 | 3.02859600  |
| H  | -1.51660900 | -2.11579800 | 2.38510300  |
| C  | 4.14395100  | 2.31648500  | 1.26662100  |
| H  | 3.10185200  | 2.56385200  | 1.50589300  |
| H  | 4.41771800  | 1.49006300  | 1.93051700  |
| C  | 5.66921700  | -2.42396400 | 1.18919400  |
| H  | 4.96799500  | -3.27036600 | 1.14516700  |
| H  | 6.14468400  | -2.45624800 | 2.17844100  |
| C  | -0.55891800 | -3.35425800 | 3.88955100  |
| H  | -1.10569600 | -4.26232100 | 3.58895000  |

|   |             |             |             |
|---|-------------|-------------|-------------|
| H | -1.11850800 | -2.90735500 | 4.72264200  |
| C | 4.88335100  | -1.11971600 | 1.02204300  |
| H | 5.57706800  | -0.27388500 | 1.13988100  |
| H | 4.12159600  | -1.02641400 | 1.80523500  |
| C | 1.69223100  | -3.34646200 | 1.99838000  |
| H | 2.26971400  | -3.78524100 | 1.17470400  |
| H | 2.21499100  | -2.42656500 | 2.29548400  |
| C | 5.03463400  | 3.53182700  | 1.53962200  |
| H | 6.08733500  | 3.26700500  | 1.35388200  |
| H | 4.96041400  | 3.81644100  | 2.59740100  |
| C | 6.72109700  | -2.57556300 | 0.08753800  |
| H | 7.26014100  | -3.52598300 | 0.19791700  |
| H | 7.46730200  | -1.77306500 | 0.19281800  |
| C | 1.86510900  | -3.25800600 | -3.59199800 |
| H | 2.70633800  | -3.85634000 | -3.20717700 |
| H | 2.23747500  | -2.71665000 | -4.47243500 |
| C | 6.08282700  | -2.48456400 | -1.30087300 |
| H | 6.85214000  | -2.55874900 | -2.08149600 |
| H | 5.40376700  | -3.33877900 | -1.44136000 |
| C | 0.84959200  | -3.74173600 | 4.34616000  |
| H | 1.35985200  | -2.84251800 | 4.72182000  |
| H | 0.80489000  | -4.45897200 | 5.17747300  |
| C | 5.27950700  | -1.18801900 | -1.46511100 |
| H | 4.79623100  | -1.17083100 | -2.45072600 |
| H | 5.96627500  | -0.32850200 | -1.43212400 |
| C | -0.27754300 | -3.90512400 | -1.69383000 |
| H | -1.08547400 | -3.27815600 | -2.09547500 |
| H | -0.69062400 | -4.43324900 | -0.82522800 |
| C | 0.72300800  | -4.19506100 | -3.99039300 |
| H | -0.07801300 | -3.60092800 | -4.45453100 |
| H | 1.06229900  | -4.92180500 | -4.74142100 |
| C | 3.81126300  | 3.07743300  | -1.09624500 |
| H | 2.76111300  | 3.33612300  | -0.89262600 |
| H | 3.87013300  | 2.79602500  | -2.15572800 |
| C | 4.64597800  | 4.70865500  | 0.64371500  |
| H | 5.30259000  | 5.57005300  | 0.82629200  |
| H | 3.62287800  | 5.02484400  | 0.89647500  |
| C | 0.15835000  | -4.91326600 | -2.76308100 |
| H | -0.68966700 | -5.55054200 | -3.05034300 |
| H | 0.92974900  | -5.57788800 | -2.34414700 |
| C | 1.65751900  | -4.31994100 | 3.18244700  |

|   |            |             |             |
|---|------------|-------------|-------------|
| H | 2.68067100 | -4.55530900 | 3.50774000  |
| H | 1.19930600 | -5.26774500 | 2.85967700  |
| C | 4.69211800 | 4.30218700  | -0.83008100 |
| H | 4.37291900 | 5.13715700  | -1.46830900 |
| H | 5.73166000 | 4.06861200  | -1.10752200 |
| H | 3.12861900 | 0.49786700  | -1.95744900 |

\*

\*\*\*\*\*

### Optimized geometry of 3

-----  
 CARTESIAN COORDINATES (ANGSTROEM)  
 -----

|    |           |           |           |
|----|-----------|-----------|-----------|
| Co | -1.131616 | -0.234854 | -0.451281 |
| P  | -0.325154 | 1.754355  | -0.072436 |
| P  | -3.046780 | -0.422057 | 0.536234  |
| N  | -1.601673 | -0.382753 | -2.167746 |
| N  | -1.890663 | -0.469375 | -3.257321 |
| C  | -0.279474 | 2.958500  | -1.534506 |
| H  | 0.237923  | 3.877620  | -1.208352 |
| C  | -0.873781 | 2.976461  | 1.272042  |
| H  | -1.688022 | 3.598646  | 0.861289  |
| C  | -1.407383 | 2.261830  | 2.516808  |
| H  | -2.241994 | 1.607706  | 2.249363  |
| H  | -0.623618 | 1.607021  | 2.918388  |
| C  | -4.218394 | 1.053209  | 0.372002  |
| H  | -3.530183 | 1.911095  | 0.431253  |
| C  | -4.204110 | -1.885003 | 0.197294  |
| H  | -5.233835 | -1.575033 | 0.441661  |
| C  | 0.499522  | 2.371413  | -2.714362 |
| H  | 0.021404  | 1.436933  | -3.031658 |
| H  | 1.509702  | 2.103257  | -2.394502 |
| C  | -4.142100 | -2.310391 | -1.274489 |
| H  | -3.100264 | -2.565829 | -1.506349 |
| H  | -4.404227 | -1.480410 | -1.938943 |
| C  | -5.672595 | 2.425262  | -1.166166 |
| H  | -4.967005 | 3.268542  | -1.133683 |
| H  | -6.159572 | 2.456012  | -2.149843 |
| C  | 0.550769  | 3.343990  | -3.896214 |
| H  | 1.101856  | 4.250375  | -3.598412 |

|   |           |           |           |
|---|-----------|-----------|-----------|
| H | 1.105619  | 2.894483  | -4.731072 |
| C | -4.890723 | 1.118053  | -1.003356 |
| H | -5.589444 | 0.274740  | -1.110178 |
| H | -4.138469 | 1.018543  | -1.794876 |
| C | -1.693135 | 3.345295  | -1.996534 |
| H | -2.266146 | 3.786521  | -1.171053 |
| H | -2.219950 | 2.426908  | -2.291073 |
| C | -5.041112 | -3.517677 | -1.556000 |
| H | -6.092882 | -3.243660 | -1.378578 |
| H | -4.960836 | -3.801924 | -2.613441 |
| C | -6.710604 | 2.586080  | -0.052691 |
| H | -7.246355 | 3.538678  | -0.160305 |
| H | -7.461855 | 1.786830  | -0.146087 |
| C | -1.850677 | 3.256819  | 3.594642  |
| H | -2.697097 | 3.850020  | 3.213291  |
| H | -2.215086 | 2.716151  | 4.478824  |
| C | -6.056445 | 2.497172  | 1.328468  |
| H | -6.816143 | 2.577917  | 2.117810  |
| H | -5.371698 | 3.348606  | 1.457775  |
| C | -0.858109 | 3.736011  | -4.347765 |
| H | -1.372907 | 2.838293  | -4.720811 |
| H | -0.814102 | 4.452479  | -5.179777 |
| C | -5.257547 | 1.197321  | 1.488018  |
| H | -4.762903 | 1.181118  | 2.468005  |
| H | -5.948915 | 0.341154  | 1.466047  |
| C | 0.277172  | 3.909086  | 1.681785  |
| H | 1.090652  | 3.287414  | 2.080388  |
| H | 0.682398  | 4.436747  | 0.809210  |
| C | -0.710787 | 4.200500  | 3.983505  |
| H | 0.095991  | 3.611559  | 4.444274  |
| H | -1.049034 | 4.927597  | 4.734660  |
| C | -3.834432 | -3.077478 | 1.090048  |
| H | -2.785312 | -3.345888 | 0.894073  |
| H | -3.898650 | -2.796701 | 2.149385  |
| C | -4.670521 | -4.698885 | -0.658151 |
| H | -5.333495 | -5.554043 | -0.846962 |
| H | -3.648421 | -5.024242 | -0.902882 |
| C | -0.157274 | 4.918091  | 2.750796  |
| H | 0.689297  | 5.560381  | 3.031095  |
| H | -0.934531 | 5.577680  | 2.334750  |
| C | -1.659603 | 4.317828  | -3.181418 |

|    |           |           |           |
|----|-----------|-----------|-----------|
| H  | -2.683165 | 4.556481  | -3.503001 |
| H  | -1.196902 | 5.264274  | -2.861074 |
| C  | -4.724634 | -4.293609 | 0.815687  |
| H  | -4.418372 | -5.132233 | 1.455459  |
| H  | -5.764077 | -4.050488 | 1.085159  |
| H  | -3.124449 | -0.511102 | 1.958653  |
| Co | 1.134439  | 0.225546  | 0.448250  |
| P  | 0.328629  | -1.763555 | 0.067197  |
| P  | 3.051341  | 0.414873  | -0.535486 |
| N  | 1.601845  | 0.372437  | 2.165597  |
| N  | 1.889090  | 0.458024  | 3.255710  |
| C  | 0.281435  | -2.970192 | 1.527236  |
| H  | -0.225934 | -3.892975 | 1.195644  |
| C  | 0.879487  | -2.982639 | -1.279169 |
| H  | 1.687188  | -3.611383 | -0.865598 |
| C  | 1.426098  | -2.264862 | -2.516494 |
| H  | 2.261221  | -1.615472 | -2.239600 |
| H  | 0.648326  | -1.604948 | -2.921398 |
| C  | 4.232289  | -1.050872 | -0.353476 |
| H  | 3.551928  | -1.914208 | -0.422352 |
| C  | 4.197069  | 1.889540  | -0.208335 |
| H  | 5.227548  | 1.590348  | -0.462892 |
| C  | -0.512433 | -2.391486 | 2.701303  |
| H  | -0.044288 | -1.454253 | 3.024873  |
| H  | -1.521848 | -2.130229 | 2.373129  |
| C  | 4.144690  | 2.315084  | 1.263814  |
| H  | 3.102284  | 2.558527  | 1.505816  |
| H  | 4.423050  | 1.488681  | 1.926108  |
| C  | 5.674919  | -2.411171 | 1.205884  |
| H  | 4.976712  | -3.260112 | 1.163047  |
| H  | 6.147625  | -2.438084 | 2.196615  |
| C  | -0.566596 | -3.367003 | 3.880573  |
| H  | -1.107537 | -4.277204 | 3.575879  |
| H  | -1.132644 | -2.923820 | 4.711278  |
| C  | 4.885014  | -1.110287 | 1.031546  |
| H  | 5.575270  | -0.261384 | 1.148550  |
| H  | 4.120416  | -1.016959 | 1.811968  |
| C  | 1.694171  | -3.346036 | 2.001072  |
| H  | 2.278175  | -3.781072 | 1.180070  |
| H  | 2.210659  | -2.423787 | 2.301892  |
| C  | 5.031889  | 3.533133  | 1.536112  |

|   |           |           |           |
|---|-----------|-----------|-----------|
| H | 6.085047  | 3.271981  | 1.347866  |
| H | 4.958977  | 3.816490  | 2.594321  |
| C | 6.730438  | -2.563466 | 0.107792  |
| H | 7.272253  | -3.511697 | 0.223296  |
| H | 7.473729  | -1.758156 | 0.212184  |
| C | 1.873583  | -3.257057 | -3.595113 |
| H | 2.714093  | -3.855929 | -3.209555 |
| H | 2.247691  | -2.714196 | -4.473885 |
| C | 6.095910  | -2.479737 | -1.282811 |
| H | 6.867726  | -2.554214 | -2.060931 |
| H | 5.420082  | -3.336701 | -1.422140 |
| C | 0.841312  | -3.748406 | 4.344093  |
| H | 1.345215  | -2.847288 | 4.723760  |
| H | 0.795685  | -4.467054 | 5.174134  |
| C | 5.288841  | -1.186456 | -1.454092 |
| H | 4.808524  | -1.174244 | -2.441228 |
| H | 5.972694  | -0.324574 | -1.421967 |
| C | -0.273034 | -3.907241 | -1.702296 |
| H | -1.080076 | -3.279636 | -2.104631 |
| H | -0.687909 | -4.436871 | -0.835451 |
| C | 0.732430  | -4.193536 | -3.997345 |
| H | -0.067650 | -3.598745 | -4.462258 |
| H | 1.073327  | -4.919118 | -4.748766 |
| C | 3.805119  | 3.077296  | -1.098011 |
| H | 2.754519  | 3.332713  | -0.892782 |
| H | 3.863370  | 2.796934  | -2.157796 |
| C | 4.637523  | 4.709481  | 0.642107  |
| H | 5.291439  | 5.572986  | 0.824386  |
| H | 3.613756  | 5.021828  | 0.896949  |
| C | 0.165251  | -4.913640 | -2.772332 |
| H | -0.681902 | -5.550662 | -3.062583 |
| H | 0.935873  | -5.578782 | -2.352792 |
| C | 1.658208  | -4.321027 | 3.183884  |
| H | 2.680818  | -4.551654 | 3.514241  |
| H | 1.206484  | -5.270730 | 2.857576  |
| C | 4.682553  | 4.304549  | -0.832131 |
| H | 4.359665  | 5.139087  | -1.469060 |
| H | 5.722369  | 4.074504  | -1.111480 |
| H | 3.132270  | 0.490365  | -1.958513 |

## Optimized geometry of Jones-Co-N2-PtBu

-----  
CARTESIAN COORDINATES (ANGSTROEM)  
-----

|    |           |           |           |
|----|-----------|-----------|-----------|
| Co | -1.119635 | -0.211751 | -0.258140 |
| N  | -1.920844 | -0.381601 | -1.830321 |
| N  | -2.406915 | -0.487889 | -2.838110 |
| P  | 0.327898  | -1.845810 | 0.088736  |
| P  | -0.333142 | 1.844197  | -0.066921 |
| Co | 1.113557  | 0.210737  | 0.282126  |
| N  | 1.909921  | 0.379194  | 1.856779  |
| N  | 2.393288  | 0.485721  | 2.865851  |
| C  | 0.618278  | -3.003751 | -1.421821 |
| C  | 1.687117  | -4.083617 | -1.213200 |
| H  | 1.892413  | -4.575046 | -2.174302 |
| H  | 2.628400  | -3.661250 | -0.847106 |
| H  | 1.365851  | -4.861863 | -0.516938 |
| C  | 1.088177  | -2.104056 | -2.572003 |
| H  | 0.418022  | -1.256047 | -2.735067 |
| H  | 2.086911  | -1.709899 | -2.364515 |
| H  | 1.138580  | -2.689549 | -3.499954 |
| C  | -0.701556 | -3.672790 | -1.840400 |
| H  | -0.532272 | -4.282448 | -2.739167 |
| H  | -1.099990 | -4.329768 | -1.063796 |
| H  | -1.465200 | -2.929420 | -2.077904 |
| C  | 0.354379  | -2.925308 | 1.679973  |
| C  | -0.101032 | -2.022807 | 2.838953  |
| H  | -0.927728 | -1.373627 | 2.550659  |
| H  | -0.419436 | -2.646125 | 3.685320  |
| H  | 0.709965  | -1.385402 | 3.191380  |
| C  | -0.600358 | -4.122933 | 1.594944  |
| H  | -0.612510 | -4.649527 | 2.559091  |
| H  | -1.624936 | -3.802148 | 1.375477  |
| H  | -0.300182 | -4.846754 | 0.833754  |
| C  | 1.772705  | -3.411099 | 2.022813  |
| H  | 2.134262  | -4.192473 | 1.352969  |
| H  | 2.483823  | -2.578608 | 1.998798  |
| H  | 1.774342  | -3.822974 | 3.041715  |
| C  | 4.285524  | -0.815997 | -0.345160 |
| H  | 4.289531  | -1.052520 | 0.723307  |
| H  | 3.962248  | -1.709626 | -0.886091 |



|   |           |           |           |
|---|-----------|-----------|-----------|
| H | 5.300809  | -0.547868 | -0.660142 |
| C | 4.023605  | 1.975050  | 0.085257  |
| H | 4.120282  | 1.839570  | 1.165899  |
| H | 5.024505  | 2.055004  | -0.353848 |
| H | 3.477061  | 2.905915  | -0.091264 |
| C | -0.356159 | 2.920807  | -1.660003 |
| C | -0.624282 | 3.005433  | 1.440820  |
| C | -4.289968 | 0.819741  | 0.370575  |
| H | -3.966656 | 1.715300  | 0.908289  |
| H | -4.294478 | 1.052704  | -0.698678 |
| H | -5.305148 | 0.552571  | 0.686649  |
| C | -4.029149 | -1.973102 | -0.048650 |
| H | -3.480476 | -2.902708 | 0.128136  |
| H | -5.028255 | -2.053331 | 0.394455  |
| H | -4.130077 | -1.840731 | -1.129301 |
| P | -3.090739 | -0.554206 | 0.680643  |
| P | 3.086520  | 0.559014  | -0.651172 |
| C | 3.408967  | 0.904321  | -2.443673 |
| H | 2.893731  | 0.192176  | -3.092609 |
| H | 3.063236  | 1.910265  | -2.695999 |
| H | 4.486970  | 0.845267  | -2.631721 |
| C | -3.410841 | -0.893292 | 2.474728  |
| H | -4.488147 | -0.828522 | 2.664923  |
| H | -3.070010 | -1.900840 | 2.727494  |
| H | -2.890681 | -0.182926 | 3.121610  |
| C | 0.696359  | 3.672558  | 1.860192  |
| H | 0.525178  | 4.290098  | 2.753180  |
| H | 1.455410  | 2.927628  | 2.107309  |
| H | 1.101455  | 4.321533  | 1.080327  |
| C | -1.097944 | 2.109635  | 2.592436  |
| H | -2.100860 | 1.724333  | 2.388455  |
| H | -0.434531 | 1.255749  | 2.752929  |
| H | -1.140197 | 2.695368  | 3.520642  |
| C | -1.690091 | 4.087588  | 1.228091  |
| H | -1.897403 | 4.579658  | 2.188429  |
| H | -1.364736 | 4.864999  | 0.532743  |
| H | -2.631075 | 3.667254  | 0.858864  |
| C | 0.095977  | 2.013866  | -2.816798 |
| H | -0.716748 | 1.376932  | -3.166166 |
| H | 0.414362  | 2.634192  | -3.665400 |
| H | 0.921751  | 1.363838  | -2.527760 |

|   |           |          |           |
|---|-----------|----------|-----------|
| C | 0.602517  | 4.115452 | -1.577621 |
| H | 1.625915  | 3.792154 | -1.356412 |
| H | 0.617121  | 4.639258 | -2.543284 |
| H | 0.303879  | 4.842538 | -0.818952 |
| C | -1.772719 | 3.410794 | -2.004600 |
| H | -2.487951 | 2.581938 | -1.975591 |
| H | -2.129779 | 4.197690 | -1.338834 |
| H | -1.773350 | 3.817119 | -3.025714 |

\*\*\*\*\*

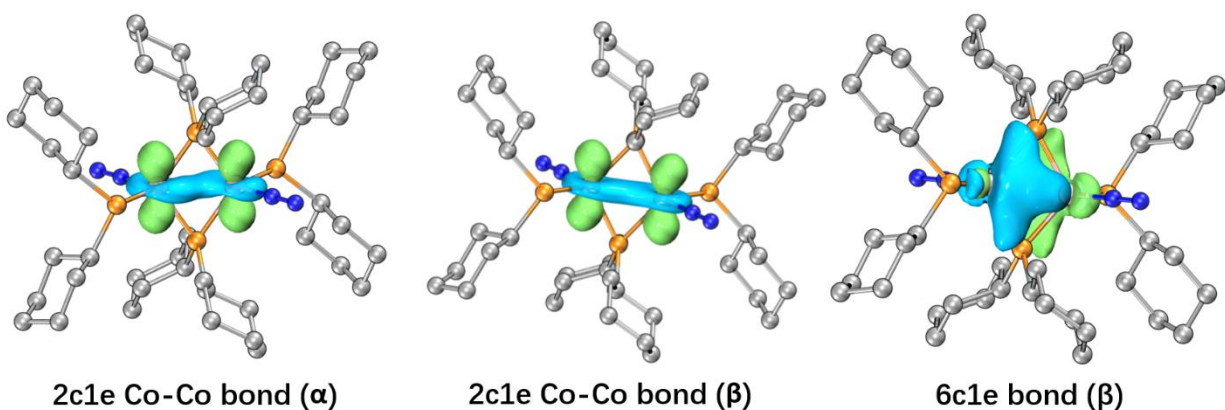

Figure S9. AdNDP analysis of **3**. 2c1e Co-Co bond ( $\alpha$ ), 2c1e Co-Co bond ( $\beta$ ) and 6c1e bond ( $\beta$ ) of **3**

\*\*\*\*\*

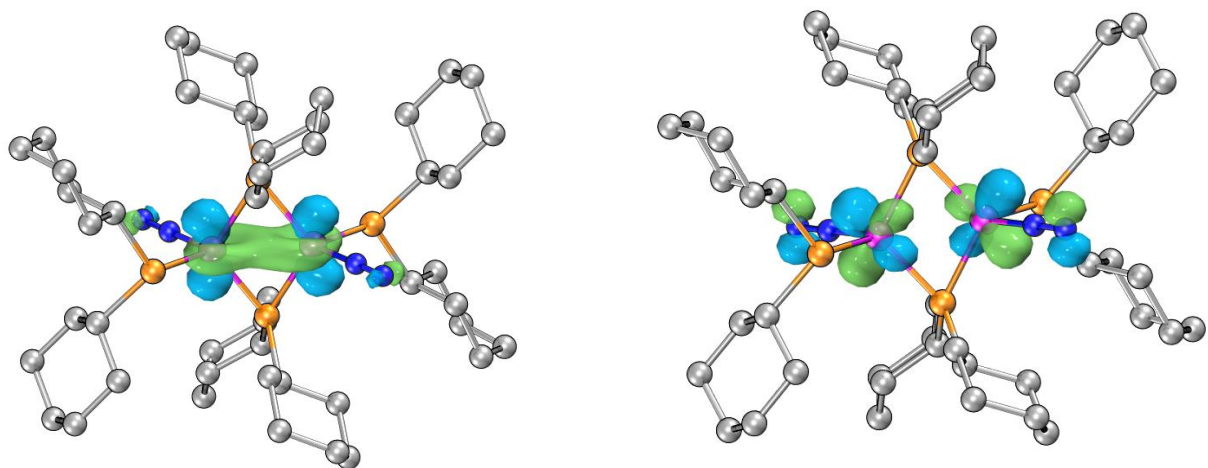

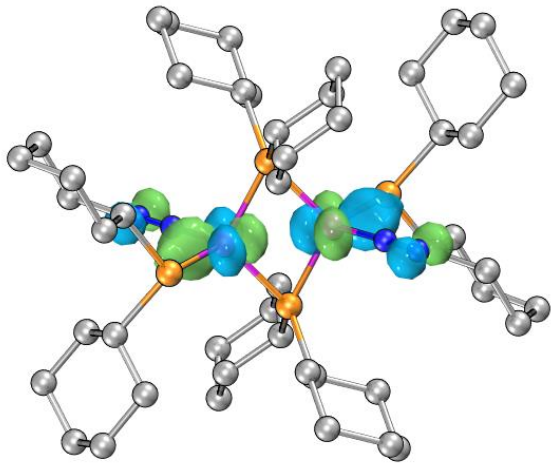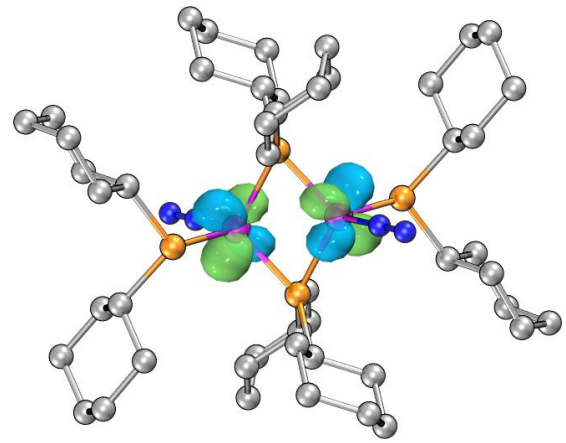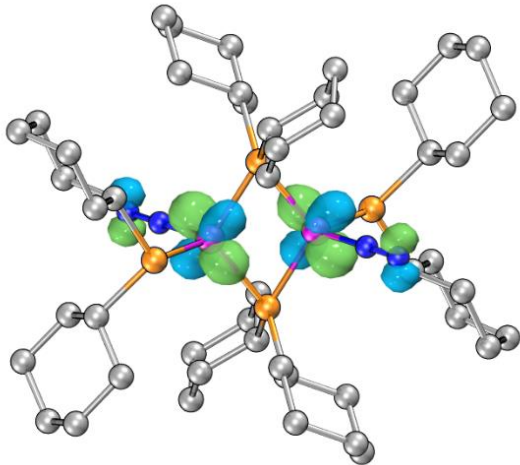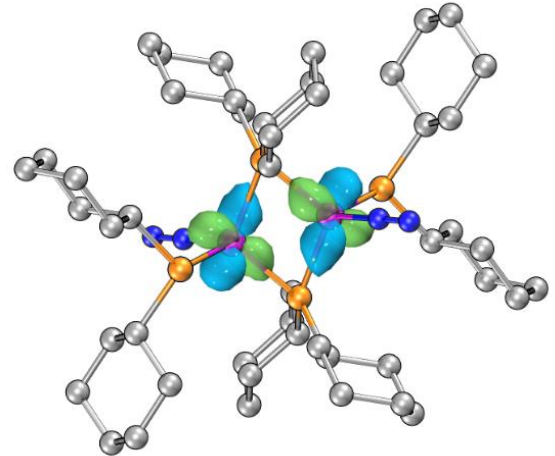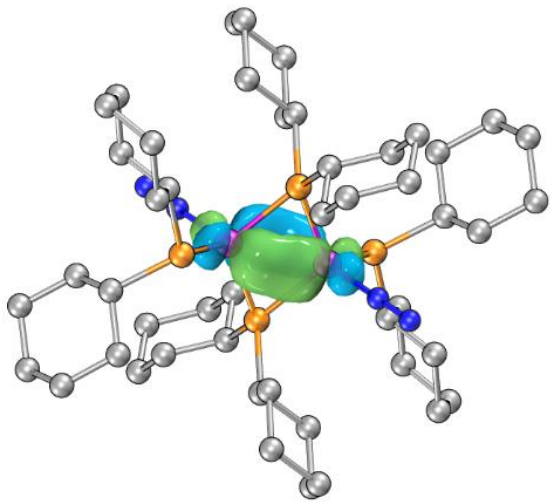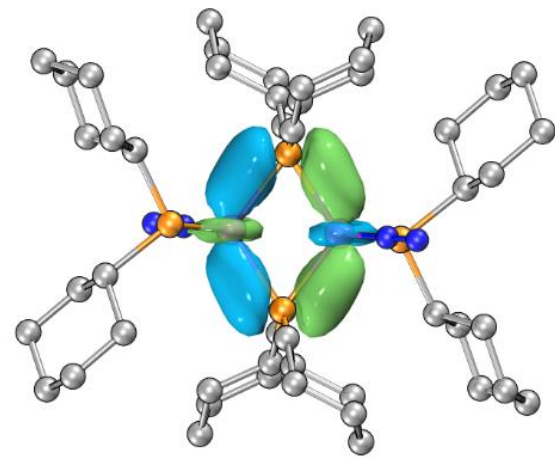

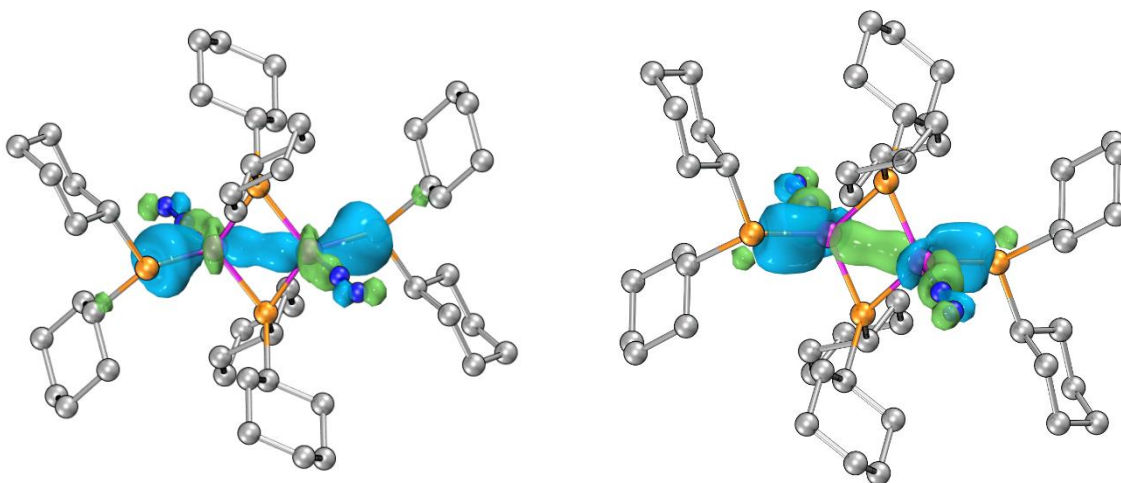

Figure S10. Frontier orbitals of **3** from SOMO-1 to SOMO-11. To pair the  $\alpha$  and  $\beta$  orbitals generated by the open shell calculations, biorthogonalization was performed based on the canonical orbitals by the Multiwfn software.

\*\*\*\*\*

### Fuzzy atom bond order of 3

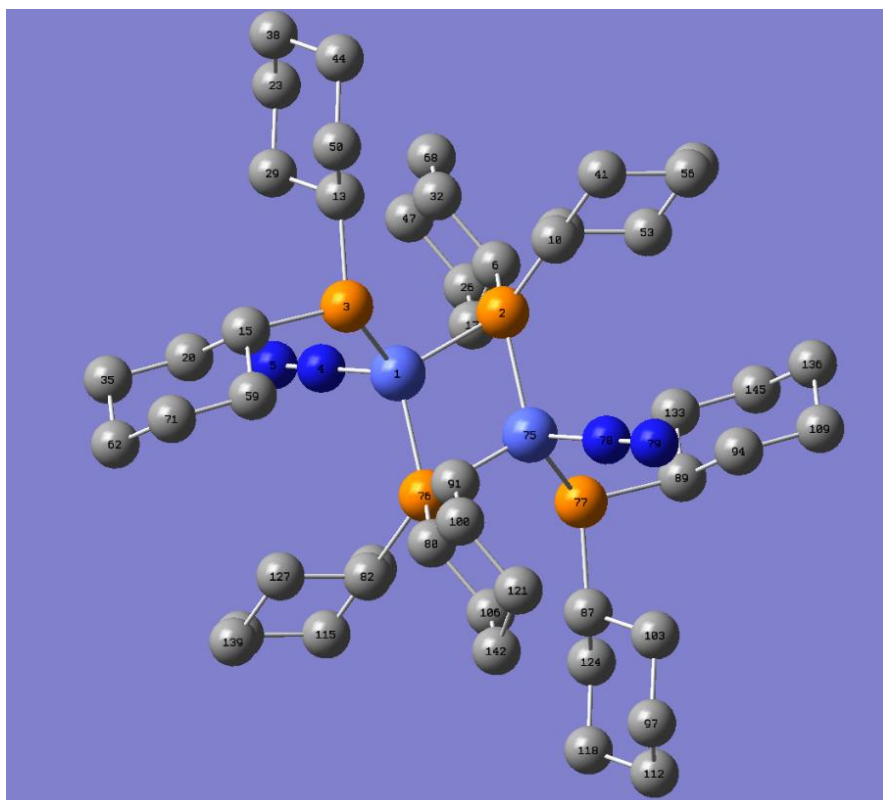

|   |     |       |               |          |       |          |        |          |
|---|-----|-------|---------------|----------|-------|----------|--------|----------|
| # | 1:  | 1(Co) | 2(P) Alpha:   | 0.534476 | Beta: | 0.560523 | Total: | 1.094998 |
| # | 2:  | 1(Co) | 3(P) Alpha:   | 0.614181 | Beta: | 0.631830 | Total: | 1.246011 |
| # | 3:  | 1(Co) | 4(N) Alpha:   | 0.652178 | Beta: | 0.688630 | Total: | 1.340808 |
| # | 4:  | 1(Co) | 5(N) Alpha:   | 0.208497 | Beta: | 0.224766 | Total: | 0.433263 |
| # | 5:  | 1(Co) | 13(C) Alpha:  | 0.029459 | Beta: | 0.032099 | Total: | 0.061557 |
| # | 6:  | 1(Co) | 15(C) Alpha:  | 0.026812 | Beta: | 0.029264 | Total: | 0.056076 |
| # | 7:  | 1(Co) | 74(H) Alpha:  | 0.027109 | Beta: | 0.024450 | Total: | 0.051559 |
| # | 8:  | 1(Co) | 75(Co) Alpha: | 0.378028 | Beta: | 0.600453 | Total: | 0.978480 |
| # | 9:  | 1(Co) | 76(P) Alpha:  | 0.541562 | Beta: | 0.565999 | Total: | 1.107561 |
| # | 10: | 2(P)  | 3(P) Alpha:   | 0.028806 | Beta: | 0.027972 | Total: | 0.056778 |
| # | 11: | 2(P)  | 6(C) Alpha:   | 0.503446 | Beta: | 0.500770 | Total: | 1.004217 |
| # | 12: | 2(P)  | 7(H) Alpha:   | 0.029405 | Beta: | 0.029119 | Total: | 0.058524 |
| # | 13: | 2(P)  | 8(C) Alpha:   | 0.503359 | Beta: | 0.500592 | Total: | 1.003951 |
| # | 14: | 2(P)  | 9(H) Alpha:   | 0.029312 | Beta: | 0.029041 | Total: | 0.058353 |
| # | 15: | 2(P)  | 10(C) Alpha:  | 0.055242 | Beta: | 0.055330 | Total: | 0.110572 |
| # | 16: | 2(P)  | 17(C) Alpha:  | 0.056957 | Beta: | 0.057067 | Total: | 0.114024 |
| # | 17: | 2(P)  | 32(C) Alpha:  | 0.060140 | Beta: | 0.060026 | Total: | 0.120166 |
| # | 18: | 2(P)  | 53(C) Alpha:  | 0.062375 | Beta: | 0.062240 | Total: | 0.124615 |
| # | 19: | 2(P)  | 75(Co) Alpha: | 0.541499 | Beta: | 0.565946 | Total: | 1.107445 |
| # | 20: | 2(P)  | 76(P) Alpha:  | 0.040600 | Beta: | 0.031977 | Total: | 0.072577 |

|   |     |       |       |        |          |       |          |        |          |
|---|-----|-------|-------|--------|----------|-------|----------|--------|----------|
| # | 21: | 3(P)  | 13(C) | Alpha: | 0.511774 | Beta: | 0.509968 | Total: | 1.021742 |
| # | 22: | 3(P)  | 14(H) | Alpha: | 0.032113 | Beta: | 0.032211 | Total: | 0.064324 |
| # | 23: | 3(P)  | 15(C) | Alpha: | 0.509590 | Beta: | 0.507797 | Total: | 1.017387 |
| # | 24: | 3(P)  | 16(H) | Alpha: | 0.027945 | Beta: | 0.027775 | Total: | 0.055720 |
| # | 25: | 3(P)  | 20(C) | Alpha: | 0.058774 | Beta: | 0.058835 | Total: | 0.117609 |
| # | 26: | 3(P)  | 29(C) | Alpha: | 0.058263 | Beta: | 0.058158 | Total: | 0.116421 |
| # | 27: | 3(P)  | 50(C) | Alpha: | 0.053052 | Beta: | 0.052376 | Total: | 0.105429 |
| # | 28: | 3(P)  | 59(C) | Alpha: | 0.062882 | Beta: | 0.062625 | Total: | 0.125507 |
| # | 29: | 3(P)  | 74(H) | Alpha: | 0.426857 | Beta: | 0.423390 | Total: | 0.850247 |
| # | 30: | 4(N)  | 5(N)  | Alpha: | 1.305394 | Beta: | 1.281413 | Total: | 2.586807 |
| # | 31: | 6(C)  | 7(H)  | Alpha: | 0.391000 | Beta: | 0.391592 | Total: | 0.782592 |
| # | 32: | 6(C)  | 17(C) | Alpha: | 0.512898 | Beta: | 0.513194 | Total: | 1.026093 |
| # | 33: | 6(C)  | 26(C) | Alpha: | 0.034955 | Beta: | 0.035041 | Total: | 0.069995 |
| # | 34: | 6(C)  | 32(C) | Alpha: | 0.513311 | Beta: | 0.514056 | Total: | 1.027367 |
| # | 35: | 6(C)  | 68(C) | Alpha: | 0.034408 | Beta: | 0.034498 | Total: | 0.068906 |
| # | 36: | 8(C)  | 9(H)  | Alpha: | 0.390708 | Beta: | 0.391260 | Total: | 0.781969 |
| # | 37: | 8(C)  | 10(C) | Alpha: | 0.513920 | Beta: | 0.514223 | Total: | 1.028143 |
| # | 38: | 8(C)  | 41(C) | Alpha: | 0.034822 | Beta: | 0.034906 | Total: | 0.069727 |
| # | 39: | 8(C)  | 53(C) | Alpha: | 0.512853 | Beta: | 0.513621 | Total: | 1.026474 |
| # | 40: | 8(C)  | 65(C) | Alpha: | 0.034596 | Beta: | 0.034685 | Total: | 0.069281 |
| # | 41: | 10(C) | 11(H) | Alpha: | 0.401546 | Beta: | 0.401416 | Total: | 0.802962 |
| # | 42: | 10(C) | 12(H) | Alpha: | 0.400304 | Beta: | 0.400273 | Total: | 0.800577 |
| # | 43: | 10(C) | 41(C) | Alpha: | 0.553808 | Beta: | 0.553799 | Total: | 1.107607 |
| # | 44: | 10(C) | 53(C) | Alpha: | 0.035425 | Beta: | 0.035469 | Total: | 0.070894 |
| # | 45: | 10(C) | 56(C) | Alpha: | 0.038586 | Beta: | 0.038585 | Total: | 0.077172 |
| # | 46: | 13(C) | 14(H) | Alpha: | 0.380214 | Beta: | 0.380011 | Total: | 0.760225 |
| # | 47: | 13(C) | 23(C) | Alpha: | 0.036192 | Beta: | 0.036220 | Total: | 0.072412 |
| # | 48: | 13(C) | 29(C) | Alpha: | 0.515545 | Beta: | 0.515734 | Total: | 1.031279 |
| # | 49: | 13(C) | 44(C) | Alpha: | 0.036577 | Beta: | 0.036637 | Total: | 0.073214 |
| # | 50: | 13(C) | 50(C) | Alpha: | 0.524168 | Beta: | 0.524158 | Total: | 1.048326 |
| # | 51: | 15(C) | 16(H) | Alpha: | 0.393480 | Beta: | 0.393384 | Total: | 0.786864 |
| # | 52: | 15(C) | 20(C) | Alpha: | 0.514254 | Beta: | 0.514410 | Total: | 1.028664 |
| # | 53: | 15(C) | 35(C) | Alpha: | 0.034980 | Beta: | 0.035018 | Total: | 0.069998 |
| # | 54: | 15(C) | 59(C) | Alpha: | 0.517278 | Beta: | 0.517486 | Total: | 1.034763 |
| # | 55: | 15(C) | 71(C) | Alpha: | 0.034913 | Beta: | 0.034956 | Total: | 0.069869 |
| # | 56: | 17(C) | 18(H) | Alpha: | 0.398369 | Beta: | 0.398333 | Total: | 0.796702 |
| # | 57: | 17(C) | 19(H) | Alpha: | 0.404522 | Beta: | 0.404368 | Total: | 0.808891 |
| # | 58: | 17(C) | 26(C) | Alpha: | 0.552892 | Beta: | 0.552864 | Total: | 1.105756 |
| # | 59: | 17(C) | 32(C) | Alpha: | 0.034740 | Beta: | 0.034780 | Total: | 0.069519 |
| # | 60: | 17(C) | 47(C) | Alpha: | 0.038651 | Beta: | 0.038647 | Total: | 0.077298 |
| # | 61: | 20(C) | 21(H) | Alpha: | 0.395291 | Beta: | 0.395183 | Total: | 0.790474 |

|        |       |       |        |          |       |          |        |          |
|--------|-------|-------|--------|----------|-------|----------|--------|----------|
| # 62:  | 20(C) | 22(H) | Alpha: | 0.408921 | Beta: | 0.408921 | Total: | 0.817842 |
| # 63:  | 20(C) | 35(C) | Alpha: | 0.553555 | Beta: | 0.553583 | Total: | 1.107139 |
| # 64:  | 20(C) | 59(C) | Alpha: | 0.035057 | Beta: | 0.035051 | Total: | 0.070108 |
| # 65:  | 20(C) | 62(C) | Alpha: | 0.038908 | Beta: | 0.038907 | Total: | 0.077815 |
| # 66:  | 23(C) | 24(H) | Alpha: | 0.420082 | Beta: | 0.420080 | Total: | 0.840162 |
| # 67:  | 23(C) | 25(H) | Alpha: | 0.432509 | Beta: | 0.432525 | Total: | 0.865034 |
| # 68:  | 23(C) | 29(C) | Alpha: | 0.553393 | Beta: | 0.553436 | Total: | 1.106828 |
| # 69:  | 23(C) | 38(C) | Alpha: | 0.558534 | Beta: | 0.558530 | Total: | 1.117063 |
| # 70:  | 23(C) | 44(C) | Alpha: | 0.039067 | Beta: | 0.039066 | Total: | 0.078133 |
| # 71:  | 26(C) | 27(H) | Alpha: | 0.425361 | Beta: | 0.425392 | Total: | 0.850753 |
| # 72:  | 26(C) | 28(H) | Alpha: | 0.431849 | Beta: | 0.431859 | Total: | 0.863708 |
| # 73:  | 26(C) | 47(C) | Alpha: | 0.557634 | Beta: | 0.557624 | Total: | 1.115258 |
| # 74:  | 26(C) | 68(C) | Alpha: | 0.039401 | Beta: | 0.039398 | Total: | 0.078799 |
| # 75:  | 29(C) | 30(H) | Alpha: | 0.413015 | Beta: | 0.413022 | Total: | 0.826036 |
| # 76:  | 29(C) | 31(H) | Alpha: | 0.406309 | Beta: | 0.406238 | Total: | 0.812547 |
| # 77:  | 29(C) | 38(C) | Alpha: | 0.039072 | Beta: | 0.039072 | Total: | 0.078143 |
| # 78:  | 29(C) | 50(C) | Alpha: | 0.034826 | Beta: | 0.034832 | Total: | 0.069658 |
| # 79:  | 32(C) | 33(H) | Alpha: | 0.417639 | Beta: | 0.417629 | Total: | 0.835268 |
| # 80:  | 32(C) | 34(H) | Alpha: | 0.402087 | Beta: | 0.402036 | Total: | 0.804123 |
| # 81:  | 32(C) | 47(C) | Alpha: | 0.038559 | Beta: | 0.038563 | Total: | 0.077123 |
| # 82:  | 32(C) | 68(C) | Alpha: | 0.554491 | Beta: | 0.554641 | Total: | 1.109131 |
| # 83:  | 35(C) | 36(H) | Alpha: | 0.426450 | Beta: | 0.426475 | Total: | 0.852924 |
| # 84:  | 35(C) | 37(H) | Alpha: | 0.431509 | Beta: | 0.431524 | Total: | 0.863033 |
| # 85:  | 35(C) | 62(C) | Alpha: | 0.558240 | Beta: | 0.558236 | Total: | 1.116477 |
| # 86:  | 35(C) | 71(C) | Alpha: | 0.039575 | Beta: | 0.039574 | Total: | 0.079150 |
| # 87:  | 38(C) | 39(H) | Alpha: | 0.435128 | Beta: | 0.435115 | Total: | 0.870243 |
| # 88:  | 38(C) | 40(H) | Alpha: | 0.426247 | Beta: | 0.426247 | Total: | 0.852494 |
| # 89:  | 38(C) | 44(C) | Alpha: | 0.558535 | Beta: | 0.558507 | Total: | 1.117042 |
| # 90:  | 38(C) | 50(C) | Alpha: | 0.038380 | Beta: | 0.038377 | Total: | 0.076757 |
| # 91:  | 41(C) | 42(H) | Alpha: | 0.424714 | Beta: | 0.424744 | Total: | 0.849457 |
| # 92:  | 41(C) | 43(H) | Alpha: | 0.431516 | Beta: | 0.431525 | Total: | 0.863041 |
| # 93:  | 41(C) | 56(C) | Alpha: | 0.558281 | Beta: | 0.558272 | Total: | 1.116553 |
| # 94:  | 41(C) | 65(C) | Alpha: | 0.039424 | Beta: | 0.039421 | Total: | 0.078845 |
| # 95:  | 44(C) | 45(H) | Alpha: | 0.434208 | Beta: | 0.434214 | Total: | 0.868422 |
| # 96:  | 44(C) | 46(H) | Alpha: | 0.424253 | Beta: | 0.424250 | Total: | 0.848503 |
| # 97:  | 44(C) | 50(C) | Alpha: | 0.555197 | Beta: | 0.555211 | Total: | 1.110408 |
| # 98:  | 47(C) | 48(H) | Alpha: | 0.421363 | Beta: | 0.421354 | Total: | 0.842717 |
| # 99:  | 47(C) | 49(H) | Alpha: | 0.436121 | Beta: | 0.436120 | Total: | 0.872241 |
| # 100: | 47(C) | 68(C) | Alpha: | 0.558107 | Beta: | 0.558117 | Total: | 1.116224 |
| # 101: | 50(C) | 51(H) | Alpha: | 0.423374 | Beta: | 0.423295 | Total: | 0.846669 |
| # 102: | 50(C) | 52(H) | Alpha: | 0.419311 | Beta: | 0.419324 | Total: | 0.838634 |

|        |        |               |          |       |          |        |          |
|--------|--------|---------------|----------|-------|----------|--------|----------|
| # 103: | 53(C)  | 54(H) Alpha:  | 0.403176 | Beta: | 0.403124 | Total: | 0.806300 |
| # 104: | 53(C)  | 55(H) Alpha:  | 0.417983 | Beta: | 0.417969 | Total: | 0.835952 |
| # 105: | 53(C)  | 56(C) Alpha:  | 0.038951 | Beta: | 0.038955 | Total: | 0.077907 |
| # 106: | 53(C)  | 65(C) Alpha:  | 0.554529 | Beta: | 0.554685 | Total: | 1.109214 |
| # 107: | 56(C)  | 57(H) Alpha:  | 0.422155 | Beta: | 0.422148 | Total: | 0.844303 |
| # 108: | 56(C)  | 58(H) Alpha:  | 0.435983 | Beta: | 0.435982 | Total: | 0.871965 |
| # 109: | 56(C)  | 65(C) Alpha:  | 0.557944 | Beta: | 0.557957 | Total: | 1.115901 |
| # 110: | 59(C)  | 60(H) Alpha:  | 0.403303 | Beta: | 0.403293 | Total: | 0.806596 |
| # 111: | 59(C)  | 61(H) Alpha:  | 0.421376 | Beta: | 0.421389 | Total: | 0.842765 |
| # 112: | 59(C)  | 62(C) Alpha:  | 0.038746 | Beta: | 0.038743 | Total: | 0.077489 |
| # 113: | 59(C)  | 71(C) Alpha:  | 0.554206 | Beta: | 0.554246 | Total: | 1.108452 |
| # 114: | 62(C)  | 63(H) Alpha:  | 0.435559 | Beta: | 0.435557 | Total: | 0.871117 |
| # 115: | 62(C)  | 64(H) Alpha:  | 0.421107 | Beta: | 0.421107 | Total: | 0.842214 |
| # 116: | 62(C)  | 71(C) Alpha:  | 0.558065 | Beta: | 0.558059 | Total: | 1.116125 |
| # 117: | 65(C)  | 66(H) Alpha:  | 0.432742 | Beta: | 0.432804 | Total: | 0.865546 |
| # 118: | 65(C)  | 67(H) Alpha:  | 0.426261 | Beta: | 0.426279 | Total: | 0.852540 |
| # 119: | 68(C)  | 69(H) Alpha:  | 0.432455 | Beta: | 0.432513 | Total: | 0.864967 |
| # 120: | 68(C)  | 70(H) Alpha:  | 0.426478 | Beta: | 0.426497 | Total: | 0.852975 |
| # 121: | 71(C)  | 72(H) Alpha:  | 0.432360 | Beta: | 0.432383 | Total: | 0.864743 |
| # 122: | 71(C)  | 73(H) Alpha:  | 0.426352 | Beta: | 0.426336 | Total: | 0.852688 |
| # 123: | 75(Co) | 76(P) Alpha:  | 0.534460 | Beta: | 0.560519 | Total: | 1.094979 |
| # 124: | 75(Co) | 77(P) Alpha:  | 0.614192 | Beta: | 0.631845 | Total: | 1.246036 |
| # 125: | 75(Co) | 78(N) Alpha:  | 0.652165 | Beta: | 0.688643 | Total: | 1.340808 |
| # 126: | 75(Co) | 79(N) Alpha:  | 0.208490 | Beta: | 0.224770 | Total: | 0.433260 |
| # 127: | 75(Co) | 87(C) Alpha:  | 0.029459 | Beta: | 0.032099 | Total: | 0.061558 |
| # 128: | 75(Co) | 89(C) Alpha:  | 0.026812 | Beta: | 0.029264 | Total: | 0.056076 |
| # 129: | 75(Co) | 148(H) Alpha: | 0.027109 | Beta: | 0.024452 | Total: | 0.051561 |
| # 130: | 76(P)  | 77(P) Alpha:  | 0.028789 | Beta: | 0.027953 | Total: | 0.056742 |
| # 131: | 76(P)  | 80(C) Alpha:  | 0.503454 | Beta: | 0.500779 | Total: | 1.004233 |
| # 132: | 76(P)  | 81(H) Alpha:  | 0.029411 | Beta: | 0.029126 | Total: | 0.058537 |
| # 133: | 76(P)  | 82(C) Alpha:  | 0.503362 | Beta: | 0.500594 | Total: | 1.003956 |
| # 134: | 76(P)  | 83(H) Alpha:  | 0.029312 | Beta: | 0.029042 | Total: | 0.058354 |
| # 135: | 76(P)  | 84(C) Alpha:  | 0.055254 | Beta: | 0.055341 | Total: | 0.110594 |
| # 136: | 76(P)  | 91(C) Alpha:  | 0.056956 | Beta: | 0.057066 | Total: | 0.114022 |
| # 137: | 76(P)  | 106(C) Alpha: | 0.060132 | Beta: | 0.060017 | Total: | 0.120149 |
| # 138: | 76(P)  | 127(C) Alpha: | 0.062362 | Beta: | 0.062227 | Total: | 0.124589 |
| # 139: | 77(P)  | 87(C) Alpha:  | 0.511786 | Beta: | 0.509981 | Total: | 1.021767 |
| # 140: | 77(P)  | 88(H) Alpha:  | 0.032119 | Beta: | 0.032217 | Total: | 0.064335 |
| # 141: | 77(P)  | 89(C) Alpha:  | 0.509597 | Beta: | 0.507805 | Total: | 1.017402 |
| # 142: | 77(P)  | 90(H) Alpha:  | 0.027945 | Beta: | 0.027775 | Total: | 0.055720 |
| # 143: | 77(P)  | 94(C) Alpha:  | 0.058775 | Beta: | 0.058837 | Total: | 0.117612 |



|        |       |        |        |          |       |          |        |          |
|--------|-------|--------|--------|----------|-------|----------|--------|----------|
| # 144: | 77(P) | 103(C) | Alpha: | 0.058261 | Beta: | 0.058157 | Total: | 0.116418 |
| # 145: | 77(P) | 124(C) | Alpha: | 0.053042 | Beta: | 0.052366 | Total: | 0.105408 |
| # 146: | 77(P) | 133(C) | Alpha: | 0.062919 | Beta: | 0.062662 | Total: | 0.125581 |
| # 147: | 77(P) | 148(H) | Alpha: | 0.426856 | Beta: | 0.423389 | Total: | 0.850246 |
| # 148: | 78(N) | 79(N)  | Alpha: | 1.305405 | Beta: | 1.281411 | Total: | 2.586816 |
| # 149: | 80(C) | 81(H)  | Alpha: | 0.390995 | Beta: | 0.391588 | Total: | 0.782583 |
| # 150: | 80(C) | 91(C)  | Alpha: | 0.512898 | Beta: | 0.513195 | Total: | 1.026093 |
| # 151: | 80(C) | 100(C) | Alpha: | 0.034958 | Beta: | 0.035044 | Total: | 0.070003 |
| # 152: | 80(C) | 106(C) | Alpha: | 0.513314 | Beta: | 0.514058 | Total: | 1.027372 |
| # 153: | 80(C) | 142(C) | Alpha: | 0.034410 | Beta: | 0.034500 | Total: | 0.068909 |
| # 154: | 82(C) | 83(H)  | Alpha: | 0.390712 | Beta: | 0.391264 | Total: | 0.781976 |
| # 155: | 82(C) | 84(C)  | Alpha: | 0.513908 | Beta: | 0.514211 | Total: | 1.028119 |
| # 156: | 82(C) | 115(C) | Alpha: | 0.034821 | Beta: | 0.034905 | Total: | 0.069727 |
| # 157: | 82(C) | 127(C) | Alpha: | 0.512864 | Beta: | 0.513632 | Total: | 1.026496 |
| # 158: | 82(C) | 139(C) | Alpha: | 0.034599 | Beta: | 0.034688 | Total: | 0.069287 |
| # 159: | 84(C) | 85(H)  | Alpha: | 0.401521 | Beta: | 0.401391 | Total: | 0.802911 |
| # 160: | 84(C) | 86(H)  | Alpha: | 0.400335 | Beta: | 0.400304 | Total: | 0.800639 |
| # 161: | 84(C) | 115(C) | Alpha: | 0.553809 | Beta: | 0.553800 | Total: | 1.107609 |
| # 162: | 84(C) | 127(C) | Alpha: | 0.035426 | Beta: | 0.035470 | Total: | 0.070896 |
| # 163: | 84(C) | 130(C) | Alpha: | 0.038588 | Beta: | 0.038587 | Total: | 0.077174 |
| # 164: | 87(C) | 88(H)  | Alpha: | 0.380225 | Beta: | 0.380022 | Total: | 0.760248 |
| # 165: | 87(C) | 97(C)  | Alpha: | 0.036192 | Beta: | 0.036220 | Total: | 0.072412 |
| # 166: | 87(C) | 103(C) | Alpha: | 0.515547 | Beta: | 0.515735 | Total: | 1.031282 |
| # 167: | 87(C) | 118(C) | Alpha: | 0.036578 | Beta: | 0.036638 | Total: | 0.073215 |
| # 168: | 87(C) | 124(C) | Alpha: | 0.524172 | Beta: | 0.524163 | Total: | 1.048335 |
| # 169: | 89(C) | 90(H)  | Alpha: | 0.393493 | Beta: | 0.393397 | Total: | 0.786890 |
| # 170: | 89(C) | 94(C)  | Alpha: | 0.514260 | Beta: | 0.514416 | Total: | 1.028676 |
| # 171: | 89(C) | 109(C) | Alpha: | 0.034980 | Beta: | 0.035018 | Total: | 0.069998 |
| # 172: | 89(C) | 133(C) | Alpha: | 0.517260 | Beta: | 0.517468 | Total: | 1.034727 |
| # 173: | 89(C) | 145(C) | Alpha: | 0.034910 | Beta: | 0.034953 | Total: | 0.069863 |
| # 174: | 91(C) | 92(H)  | Alpha: | 0.398396 | Beta: | 0.398361 | Total: | 0.796757 |
| # 175: | 91(C) | 93(H)  | Alpha: | 0.404481 | Beta: | 0.404327 | Total: | 0.808809 |
| # 176: | 91(C) | 100(C) | Alpha: | 0.552891 | Beta: | 0.552862 | Total: | 1.105753 |
| # 177: | 91(C) | 106(C) | Alpha: | 0.034743 | Beta: | 0.034783 | Total: | 0.069526 |
| # 178: | 91(C) | 121(C) | Alpha: | 0.038653 | Beta: | 0.038650 | Total: | 0.077303 |
| # 179: | 94(C) | 95(H)  | Alpha: | 0.395287 | Beta: | 0.395178 | Total: | 0.790465 |
| # 180: | 94(C) | 96(H)  | Alpha: | 0.408949 | Beta: | 0.408950 | Total: | 0.817899 |
| # 181: | 94(C) | 109(C) | Alpha: | 0.553551 | Beta: | 0.553579 | Total: | 1.107130 |
| # 182: | 94(C) | 133(C) | Alpha: | 0.035051 | Beta: | 0.035045 | Total: | 0.070095 |
| # 183: | 94(C) | 136(C) | Alpha: | 0.038907 | Beta: | 0.038906 | Total: | 0.077813 |
| # 184: | 97(C) | 98(H)  | Alpha: | 0.420084 | Beta: | 0.420082 | Total: | 0.840167 |

|        |        |        |        |          |       |          |        |          |
|--------|--------|--------|--------|----------|-------|----------|--------|----------|
| # 185: | 97(C)  | 99(H)  | Alpha: | 0.432509 | Beta: | 0.432525 | Total: | 0.865034 |
| # 186: | 97(C)  | 103(C) | Alpha: | 0.553390 | Beta: | 0.553433 | Total: | 1.106823 |
| # 187: | 97(C)  | 112(C) | Alpha: | 0.558533 | Beta: | 0.558528 | Total: | 1.117061 |
| # 188: | 97(C)  | 118(C) | Alpha: | 0.039066 | Beta: | 0.039065 | Total: | 0.078131 |
| # 189: | 100(C) | 101(H) | Alpha: | 0.425363 | Beta: | 0.425395 | Total: | 0.850758 |
| # 190: | 100(C) | 102(H) | Alpha: | 0.431850 | Beta: | 0.431859 | Total: | 0.863709 |
| # 191: | 100(C) | 121(C) | Alpha: | 0.557635 | Beta: | 0.557625 | Total: | 1.115261 |
| # 192: | 100(C) | 142(C) | Alpha: | 0.039399 | Beta: | 0.039396 | Total: | 0.078795 |
| # 193: | 103(C) | 104(H) | Alpha: | 0.413014 | Beta: | 0.413021 | Total: | 0.826035 |
| # 194: | 103(C) | 105(H) | Alpha: | 0.406294 | Beta: | 0.406224 | Total: | 0.812518 |
| # 195: | 103(C) | 112(C) | Alpha: | 0.039073 | Beta: | 0.039073 | Total: | 0.078145 |
| # 196: | 103(C) | 124(C) | Alpha: | 0.034827 | Beta: | 0.034833 | Total: | 0.069660 |
| # 197: | 106(C) | 107(H) | Alpha: | 0.417648 | Beta: | 0.417638 | Total: | 0.835287 |
| # 198: | 106(C) | 108(H) | Alpha: | 0.402095 | Beta: | 0.402045 | Total: | 0.804140 |
| # 199: | 106(C) | 121(C) | Alpha: | 0.038556 | Beta: | 0.038560 | Total: | 0.077117 |
| # 200: | 106(C) | 142(C) | Alpha: | 0.554492 | Beta: | 0.554642 | Total: | 1.109134 |
| # 201: | 109(C) | 110(H) | Alpha: | 0.426451 | Beta: | 0.426476 | Total: | 0.852927 |
| # 202: | 109(C) | 111(H) | Alpha: | 0.431511 | Beta: | 0.431526 | Total: | 0.863037 |
| # 203: | 109(C) | 136(C) | Alpha: | 0.558239 | Beta: | 0.558235 | Total: | 1.116473 |
| # 204: | 109(C) | 145(C) | Alpha: | 0.039575 | Beta: | 0.039574 | Total: | 0.079149 |
| # 205: | 112(C) | 113(H) | Alpha: | 0.435129 | Beta: | 0.435115 | Total: | 0.870244 |
| # 206: | 112(C) | 114(H) | Alpha: | 0.426257 | Beta: | 0.426256 | Total: | 0.852513 |
| # 207: | 112(C) | 118(C) | Alpha: | 0.558536 | Beta: | 0.558508 | Total: | 1.117044 |
| # 208: | 112(C) | 124(C) | Alpha: | 0.038380 | Beta: | 0.038378 | Total: | 0.076758 |
| # 209: | 115(C) | 116(H) | Alpha: | 0.424714 | Beta: | 0.424744 | Total: | 0.849457 |
| # 210: | 115(C) | 117(H) | Alpha: | 0.431518 | Beta: | 0.431527 | Total: | 0.863045 |
| # 211: | 115(C) | 130(C) | Alpha: | 0.558281 | Beta: | 0.558272 | Total: | 1.116552 |
| # 212: | 115(C) | 139(C) | Alpha: | 0.039422 | Beta: | 0.039419 | Total: | 0.078842 |
| # 213: | 118(C) | 119(H) | Alpha: | 0.434210 | Beta: | 0.434217 | Total: | 0.868427 |
| # 214: | 118(C) | 120(H) | Alpha: | 0.424249 | Beta: | 0.424246 | Total: | 0.848495 |
| # 215: | 118(C) | 124(C) | Alpha: | 0.555195 | Beta: | 0.555208 | Total: | 1.110403 |
| # 216: | 121(C) | 122(H) | Alpha: | 0.421363 | Beta: | 0.421354 | Total: | 0.842716 |
| # 217: | 121(C) | 123(H) | Alpha: | 0.436121 | Beta: | 0.436121 | Total: | 0.872242 |
| # 218: | 121(C) | 142(C) | Alpha: | 0.558108 | Beta: | 0.558118 | Total: | 1.116226 |
| # 219: | 124(C) | 125(H) | Alpha: | 0.423382 | Beta: | 0.423303 | Total: | 0.846685 |
| # 220: | 124(C) | 126(H) | Alpha: | 0.419312 | Beta: | 0.419325 | Total: | 0.838638 |
| # 221: | 127(C) | 128(H) | Alpha: | 0.403172 | Beta: | 0.403121 | Total: | 0.806293 |
| # 222: | 127(C) | 129(H) | Alpha: | 0.418004 | Beta: | 0.417990 | Total: | 0.835994 |
| # 223: | 127(C) | 130(C) | Alpha: | 0.038949 | Beta: | 0.038953 | Total: | 0.077902 |
| # 224: | 127(C) | 139(C) | Alpha: | 0.554528 | Beta: | 0.554685 | Total: | 1.109213 |
| # 225: | 130(C) | 131(H) | Alpha: | 0.422158 | Beta: | 0.422152 | Total: | 0.844310 |

|   |      |        |        |        |          |       |          |        |          |
|---|------|--------|--------|--------|----------|-------|----------|--------|----------|
| # | 226: | 130(C) | 132(H) | Alpha: | 0.435984 | Beta: | 0.435984 | Total: | 0.871968 |
| # | 227: | 130(C) | 139(C) | Alpha: | 0.557946 | Beta: | 0.557959 | Total: | 1.115905 |
| # | 228: | 133(C) | 134(H) | Alpha: | 0.403283 | Beta: | 0.403272 | Total: | 0.806555 |
| # | 229: | 133(C) | 135(H) | Alpha: | 0.421376 | Beta: | 0.421389 | Total: | 0.842764 |
| # | 230: | 133(C) | 136(C) | Alpha: | 0.038743 | Beta: | 0.038740 | Total: | 0.077483 |
| # | 231: | 133(C) | 145(C) | Alpha: | 0.554205 | Beta: | 0.554245 | Total: | 1.108450 |
| # | 232: | 136(C) | 137(H) | Alpha: | 0.435557 | Beta: | 0.435555 | Total: | 0.871112 |
| # | 233: | 136(C) | 138(H) | Alpha: | 0.421077 | Beta: | 0.421076 | Total: | 0.842153 |
| # | 234: | 136(C) | 145(C) | Alpha: | 0.558063 | Beta: | 0.558057 | Total: | 1.116120 |
| # | 235: | 139(C) | 140(H) | Alpha: | 0.432746 | Beta: | 0.432809 | Total: | 0.865555 |
| # | 236: | 139(C) | 141(H) | Alpha: | 0.426260 | Beta: | 0.426278 | Total: | 0.852538 |
| # | 237: | 142(C) | 143(H) | Alpha: | 0.432456 | Beta: | 0.432514 | Total: | 0.864969 |
| # | 238: | 142(C) | 144(H) | Alpha: | 0.426482 | Beta: | 0.426501 | Total: | 0.852984 |
| # | 239: | 145(C) | 146(H) | Alpha: | 0.432355 | Beta: | 0.432378 | Total: | 0.864732 |
| # | 240: | 145(C) | 147(H) | Alpha: | 0.426355 | Beta: | 0.426339 | Total: | 0.852694 |

### Fuzzy atom bond order of Jones-Co-N2-PtBu

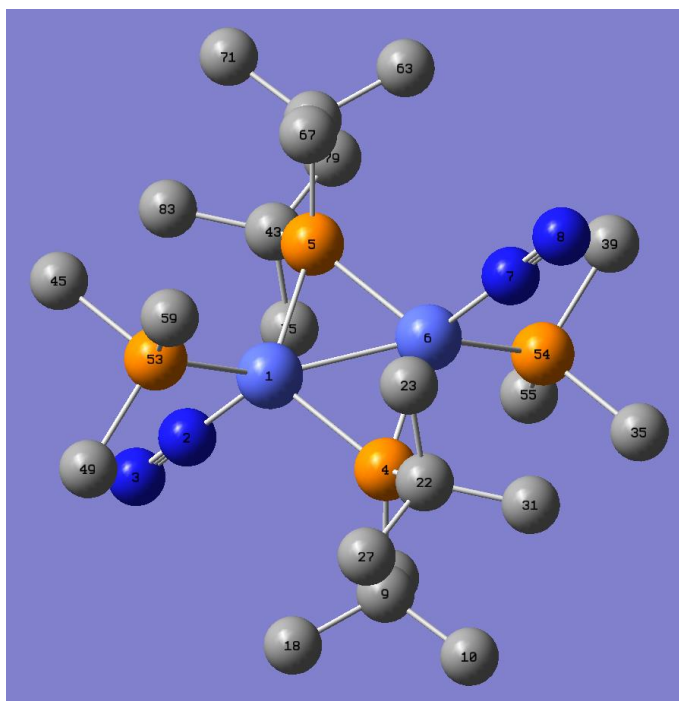

|   |    |       |       |            |
|---|----|-------|-------|------------|
| # | 1: | 1(Co) | 2(N)  | 1.28612718 |
| # | 2: | 1(Co) | 3(N)  | 0.40021316 |
| # | 3: | 1(Co) | 4(P)  | 1.04634694 |
| # | 4: | 1(Co) | 5(P)  | 1.04746634 |
| # | 5: | 1(Co) | 6(Co) | 1.30866478 |
| # | 6: | 1(Co) | 45(C) | 0.06556405 |

|   |     |       |       |            |
|---|-----|-------|-------|------------|
| # | 7:  | 1(Co) | 49(C) | 0.05854445 |
| # | 8:  | 1(Co) | 53(P) | 1.13011519 |
| # | 9:  | 1(Co) | 54(P) | 0.06088464 |
| # | 10: | 1(Co) | 59(C) | 0.05015158 |
| # | 11: | 2(N)  | 3(N)  | 2.61253894 |
| # | 12: | 2(N)  | 53(P) | 0.08342229 |
| # | 13: | 4(P)  | 5(P)  | 0.08796103 |
| # | 14: | 4(P)  | 6(Co) | 1.04719316 |
| # | 15: | 4(P)  | 9(C)  | 0.95461335 |
| # | 16: | 4(P)  | 10(C) | 0.10540660 |
| # | 17: | 4(P)  | 14(C) | 0.13059980 |
| # | 18: | 4(P)  | 18(C) | 0.11979153 |
| # | 19: | 4(P)  | 22(C) | 0.95718208 |
| # | 20: | 4(P)  | 23(C) | 0.12745641 |
| # | 21: | 4(P)  | 27(C) | 0.11590864 |
| # | 22: | 4(P)  | 31(C) | 0.11662910 |
| # | 23: | 5(P)  | 6(Co) | 1.04667849 |
| # | 24: | 5(P)  | 43(C) | 0.95724784 |
| # | 25: | 5(P)  | 44(C) | 0.95467860 |
| # | 26: | 5(P)  | 63(C) | 0.11997564 |
| # | 27: | 5(P)  | 67(C) | 0.13053810 |
| # | 28: | 5(P)  | 71(C) | 0.10535351 |
| # | 29: | 5(P)  | 75(C) | 0.12751008 |
| # | 30: | 5(P)  | 79(C) | 0.11572830 |
| # | 31: | 5(P)  | 83(C) | 0.11660025 |
| # | 32: | 6(Co) | 7(N)  | 1.28628474 |
| # | 33: | 6(Co) | 8(N)  | 0.40018696 |
| # | 34: | 6(Co) | 35(C) | 0.06566217 |
| # | 35: | 6(Co) | 39(C) | 0.05839095 |
| # | 36: | 6(Co) | 53(P) | 0.06095512 |
| # | 37: | 6(Co) | 54(P) | 1.13006159 |
| # | 38: | 6(Co) | 55(C) | 0.05014628 |
| # | 39: | 7(N)  | 8(N)  | 2.61246918 |
| # | 40: | 7(N)  | 54(P) | 0.08331706 |
| # | 41: | 9(C)  | 10(C) | 1.04348627 |
| # | 42: | 9(C)  | 14(C) | 1.01790940 |
| # | 43: | 9(C)  | 18(C) | 1.02852025 |
| # | 44: | 10(C) | 11(H) | 0.87587939 |
| # | 45: | 10(C) | 12(H) | 0.86691228 |
| # | 46: | 10(C) | 13(H) | 0.86757214 |
| # | 47: | 10(C) | 14(C) | 0.09776395 |

|       |       |       |            |
|-------|-------|-------|------------|
| # 48: | 10(C) | 18(C) | 0.09237003 |
| # 49: | 14(C) | 15(H) | 0.82656895 |
| # 50: | 14(C) | 16(H) | 0.84066297 |
| # 51: | 14(C) | 17(H) | 0.87222893 |
| # 52: | 14(C) | 18(C) | 0.09009255 |
| # 53: | 18(C) | 19(H) | 0.87503543 |
| # 54: | 18(C) | 20(H) | 0.86403339 |
| # 55: | 18(C) | 21(H) | 0.83447726 |
| # 56: | 22(C) | 23(C) | 1.01202994 |
| # 57: | 22(C) | 27(C) | 1.03973864 |
| # 58: | 22(C) | 31(C) | 1.03137215 |
| # 59: | 23(C) | 24(H) | 0.81598842 |
| # 60: | 23(C) | 25(H) | 0.87189609 |
| # 61: | 23(C) | 26(H) | 0.82728836 |
| # 62: | 23(C) | 27(C) | 0.09445446 |
| # 63: | 23(C) | 31(C) | 0.09992606 |
| # 64: | 27(C) | 28(H) | 0.87722285 |
| # 65: | 27(C) | 29(H) | 0.86386440 |
| # 66: | 27(C) | 30(H) | 0.86595697 |
| # 67: | 27(C) | 31(C) | 0.08984402 |
| # 68: | 31(C) | 32(H) | 0.86462105 |
| # 69: | 31(C) | 33(H) | 0.85415209 |
| # 70: | 31(C) | 34(H) | 0.87371039 |
| # 71: | 35(C) | 36(H) | 0.84890297 |
| # 72: | 35(C) | 37(H) | 0.85348931 |
| # 73: | 35(C) | 38(H) | 0.87299777 |
| # 74: | 35(C) | 54(P) | 1.13581710 |
| # 75: | 36(H) | 54(P) | 0.07213241 |
| # 76: | 37(H) | 54(P) | 0.07382218 |
| # 77: | 38(H) | 54(P) | 0.06747706 |
| # 78: | 39(C) | 40(H) | 0.84059173 |
| # 79: | 39(C) | 41(H) | 0.87110347 |
| # 80: | 39(C) | 42(H) | 0.85465099 |
| # 81: | 39(C) | 54(P) | 1.13754826 |
| # 82: | 39(C) | 55(C) | 0.05382090 |
| # 83: | 40(H) | 54(P) | 0.06915520 |
| # 84: | 41(H) | 54(P) | 0.06869601 |
| # 85: | 42(H) | 54(P) | 0.07547045 |
| # 86: | 43(C) | 75(C) | 1.01194982 |
| # 87: | 43(C) | 79(C) | 1.03974064 |
| # 88: | 43(C) | 83(C) | 1.03127738 |

|        |       |       |            |
|--------|-------|-------|------------|
| # 89:  | 44(C) | 63(C) | 1.02836297 |
| # 90:  | 44(C) | 67(C) | 1.01798827 |
| # 91:  | 44(C) | 71(C) | 1.04338523 |
| # 92:  | 45(C) | 46(H) | 0.85345379 |
| # 93:  | 45(C) | 47(H) | 0.84881729 |
| # 94:  | 45(C) | 48(H) | 0.87297898 |
| # 95:  | 45(C) | 53(P) | 1.13583120 |
| # 96:  | 46(H) | 53(P) | 0.07383297 |
| # 97:  | 47(H) | 53(P) | 0.07211221 |
| # 98:  | 48(H) | 53(P) | 0.06747688 |
| # 99:  | 49(C) | 50(H) | 0.85462808 |
| # 100: | 49(C) | 51(H) | 0.87109071 |
| # 101: | 49(C) | 52(H) | 0.84074854 |
| # 102: | 49(C) | 53(P) | 1.13746321 |
| # 103: | 49(C) | 59(C) | 0.05396786 |
| # 104: | 50(H) | 53(P) | 0.07547930 |
| # 105: | 51(H) | 53(P) | 0.06863965 |
| # 106: | 52(H) | 53(P) | 0.06916798 |
| # 107: | 53(P) | 59(C) | 1.14261294 |
| # 108: | 53(P) | 60(H) | 0.07210593 |
| # 109: | 53(P) | 61(H) | 0.07363766 |
| # 110: | 53(P) | 62(H) | 0.07091295 |
| # 111: | 54(P) | 55(C) | 1.14275119 |
| # 112: | 54(P) | 56(H) | 0.07106398 |
| # 113: | 54(P) | 57(H) | 0.07356668 |
| # 114: | 54(P) | 58(H) | 0.07210692 |
| # 115: | 55(C) | 56(H) | 0.85407878 |
| # 116: | 55(C) | 57(H) | 0.85140677 |
| # 117: | 55(C) | 58(H) | 0.86551687 |
| # 118: | 59(C) | 60(H) | 0.86542101 |
| # 119: | 59(C) | 61(H) | 0.85139640 |
| # 120: | 59(C) | 62(H) | 0.85396896 |
| # 121: | 63(C) | 64(H) | 0.87507117 |
| # 122: | 63(C) | 65(H) | 0.83444721 |
| # 123: | 63(C) | 66(H) | 0.86388983 |
| # 124: | 63(C) | 67(C) | 0.09020743 |
| # 125: | 63(C) | 71(C) | 0.09249667 |
| # 126: | 67(C) | 68(H) | 0.84081936 |
| # 127: | 67(C) | 69(H) | 0.82644886 |
| # 128: | 67(C) | 70(H) | 0.87217439 |
| # 129: | 67(C) | 71(C) | 0.09784094 |

|        |       |       |            |
|--------|-------|-------|------------|
| # 130: | 71(C) | 72(H) | 0.87579967 |
| # 131: | 71(C) | 73(H) | 0.86750734 |
| # 132: | 71(C) | 74(H) | 0.86683087 |
| # 133: | 75(C) | 76(H) | 0.82715363 |
| # 134: | 75(C) | 77(H) | 0.87183001 |
| # 135: | 75(C) | 78(H) | 0.81587431 |
| # 136: | 75(C) | 79(C) | 0.09429448 |
| # 137: | 75(C) | 83(C) | 0.10001089 |
| # 138: | 79(C) | 80(H) | 0.86370822 |
| # 139: | 79(C) | 81(H) | 0.87721747 |
| # 140: | 79(C) | 82(H) | 0.86615458 |
| # 141: | 79(C) | 83(C) | 0.08989741 |
| # 142: | 83(C) | 84(H) | 0.85417492 |
| # 143: | 83(C) | 85(H) | 0.86463759 |
| # 144: | 83(C) | 86(H) | 0.87367077 |

## S6. References

- [1] F. Neese, *WIREs Comput. Mol. Sci.*, 2012, **2**, 73-78.
- [2] F. Neese, *WIREs Comput. Mol. Sci.*, 2018, **8**, e1327.
- [3] J. W. Furness, A. D. Kaplan, J. Ning, J. P. Perdew, J. Sun, *J. Phys. Chem. Lett.*, 2020, **11**, 8208-8215.
- [4] E. Caldeweyher, C. Bannwarth, S. Grimme, *J. Chem. Phys.*, 2017, **147**, 034112.
- [5] S.-H. Chong, S. Ham, *J. Chem. Phys.*, 2012, **137**, 154101.
- [6] T. Lu, F. Chen, *J. Comput. Chem.*, 2012, **33**, 580-592.
- [7] D. Y. Zubarev, Z. A. I. Boldyrev, *Phys. Chem. Chem. Phys.*, 2008, **10**, 5207-5217.
- [8] L. B. Schenkel, J. A. Ellman, *Org. Lett.* 2003, **5**, 545-548.
- [9] S. Chakraborty, G. Leitens, D. Milstein, *Angew. Chem. Int. Ed.* 2017, **56**, 2074-2078.
